1 Guanosine inhibits hepatitis C virus replication and increases indel frequencies,  
2 associated with altered intracellular nucleotide pools

3 Rosario Sabariego<sup>1,2,6¶</sup>, Ana M. Ortega-Prieto <sup>4¶</sup>, Luis Díaz-Martínez <sup>5</sup>, Ana Grande-Pérez <sup>5</sup>,  
4 Isabel Gallego<sup>4,7</sup>, Ana I. de Ávila<sup>4</sup>, María Eugenia Soria<sup>4,8</sup>, Pablo Gastaminza<sup>7,9</sup>, Esteban  
5 Domingo,<sup>4,6,7\*</sup> Celia Perales<sup>4,7,8\*</sup> and Antonio Mas<sup>1,3,6\*</sup>

6 <sup>1</sup>Laboratorio de Virología Molecular, Centro Regional de Investigaciones Biomédicas (CRIB),  
7 Universidad de Castilla-La Mancha, Albacete 02008-Spain.

8 <sup>2</sup>Facultad de Medicina and <sup>3</sup>Facultad de Farmacia, Universidad de Castilla-La Mancha, Albacete  
9 02008-Spain.

10 <sup>4</sup>Centro de Biología Molecular “Severo Ochoa”, Consejo Superior de Investigaciones  
11 Científicas (CSIC)-Universidad Autónoma de Madrid (UAM), Campus de Cantoblanco, Madrid  
12 28049-Spain.

13 <sup>5</sup>Instituto de Hortofruticultura Subtropical y Mediterránea "La Mayora," Consejo Superior de  
14 Investigaciones Científicas-Universidad de Málaga, Área de Genética, Facultad de Ciencias,  
15 Campus de Teatinos, Málaga, Spain.

16 <sup>6</sup>Unidad de Biomedicina UCLM-CSIC.

17 <sup>7</sup>Centro de Investigación Biomédica en Red de Enfermedades Hepáticas y Digestivas  
18 (CIBERehd) del Instituto de Salud Carlos III, 28029, Madrid, Spain

19 <sup>8</sup>Department of Clinical Microbiology, IIS-Fundación Jiménez Díaz, UAM. Av. Reyes  
20 Católicos 2, 28040 Madrid, Spain

21 <sup>9</sup>Department of Cellular and Molecular Biology, Centro Nacional de Biotecnología, Consejo  
22 Superior de Investigaciones Científicas (CSIC), Campus de Cantoblanco, Madrid 28049-Spain.

23

24 <sup>¶</sup>These authors contributed equally to this work.

25

26 \*Corresponding authors: Antonio Mas

27 e-mail: Antonio.Mas@uclm.es

28 Celia Perales  
29 e-mail: [cperales@cbm.csic.es](mailto:cperales@cbm.csic.es)  
30 Esteban Domingo  
31 e-mail: [edomingo@cbm.csic.es](mailto:edomingo@cbm.csic.es)

32 **Abstract**

33 In the course of experiments aimed at deciphering the inhibition mechanism of mycophenolic  
34 acid and ribavirin in hepatitis C virus (HCV) infection, we observed an inhibitory effect of the  
35 nucleoside guanosine (Gua). Here, we report that Gua and not the other standard nucleosides  
36 inhibits HCV replication in human hepatoma cells. Gua did not directly inhibit the *in vitro*  
37 polymerase activity of NS5B, but it modified the intracellular levels of nucleoside di- and tri-  
38 phosphate (NDPs and NTPs), leading to deficient HCV RNA replication and reduction of  
39 infectious progeny virus production. Changes in the concentrations of NTP or NDP modified  
40 NS5B RNA polymerase activity *in vitro*, in particular *de novo* RNA synthesis and template  
41 switching. Furthermore, the Gua-mediated changes were associated with a significant increase  
42 in the number of indels in viral RNA, which may account for the reduction of the specific  
43 infectivity of the viral progeny, suggesting the presence of defective genomes. Thus, a proper  
44 NTP:NDP balance appears to be critical to ensure HCV polymerase fidelity and minimal  
45 production of defective genomes.

46

47 **Author summary**

48 Ribonucleoside metabolism is essential for replication of RNA viruses. In this article we  
49 describe the antiviral activity of the natural ribonucleoside guanosine (Gua). We demonstrate  
50 that hepatitis C virus (HCV) replication is inhibited in the presence of increasing concentrations  
51 of this ribonucleoside and that this inhibition does not occur as a consequence of a direct  
52 inhibition of HCV polymerase. Cells exposed to increasing concentrations of Gua show  
53 imbalances in the intracellular concentrations of nucleoside-diphosphates and triphosphates and  
54 as the virus is passaged in these cells, it accumulates mutations that reduce its infectivity and  
55 decimate its normal spreading capacity.

56

## 57 **Introduction**

58 Positive-sense single-stranded RNA viruses [(+)ssRNA viruses] are the most abundant  
59 pathogens for humans. The hepatitis C virus (HCV) is a hepacivirus that belongs to the  
60 *Flaviviridae* family of (+)ssRNA viruses. The HCV genome encodes information for the  
61 synthesis of ten proteins: core (C), envelope glycoproteins (E1 and E2), an ion channel (p7),  
62 NS2 protease, protease/helicase NS3 (and its cofactor NS4A), membrane-associated protein  
63 NS4B, regulator of viral replication NS5A, and RNA-dependent RNA-polymerase NS5B [1].

64 There are several ways to approach the control of RNA viral diseases. Inhibition of HCV  
65 functions by direct-acting antiviral agents (DAAs) has yielded sustained virological responses  
66 of about 98% [2,3]. Thus, HCV infection may be targeted for eradication by the combined use  
67 of different DAAs directed to viral proteins. However, access to this treatment is not affordable  
68 in countries with high prevalence rates, and an effective prophylactic vaccine is not available,  
69 making global HCV eradication difficult. Consequently, treatment with a combination of  
70 pegylated interferon-alpha (PEG-IFN $\alpha$ ) plus ribavirin (Rib) is still in use in several countries  
71 with high prevalence rates of HCV infection [4].

72 Rib displays several mechanisms of antiviral activity [5], a major one being the inhibition of  
73 inosine-5'-monophosphate (IMP) dehydrogenase (IMPDH), which converts IMP to xanthosine  
74 monophosphate (XMP) and thus is involved in the *de novo* biosynthesis of GTP [6]. Rib also  
75 exerts its antiviral activity through lethal mutagenesis [7-10]. In the course of our experiments  
76 on the effect of mycophenolic acid and Rib on HCV clonal population HCV p0 [11] we  
77 observed that the presence of guanosine (Gua) during viral replication produced a decrease of  
78 up to 100 times in infectious progeny production. Although there are Gua derivatives that have  
79 antiviral properties, including Rib itself, natural Gua has never been identified as having  
80 antiviral activity [5]. The objective of the present study was to quantify the inhibitory role of  
81 Gua on HCV, its specificity, and its mechanism of action. We show that i) Gua inhibits  
82 infectious HCV progeny production but does not inhibit directly the HCV polymerase; ii) Gua  
83 alters the intracellular pools of di- and triphosphate ribonucleosides (NDP and NTP); iii) the

84 imbalance of the concentrations of NDP and NTP results in the inhibition of HCV polymerase  
85 activity *in vitro*, and iv) Gua treatment is associated with an increase of indel frequency in  
86 progeny HCV RNA. The results provide evidence of a metabolism-dependent mechanism of  
87 generation of defective HCV genomes.

88

## 89 **Results**

### 90 **Effect of ribonucleosides on HCV replication**

91 Before studying the possible anti-HCV effect of natural nucleosides we determined their  
92 cytotoxicity ( $CC_{50}$ ) on Huh-7.5 reporter cells. The cytotoxicity of Gua, adenosine (Ade),  
93 cytidine (Cyt) or uridine (Uri) was analyzed in semiconfluent cell monolayers by exposing cells  
94 to different nucleoside concentrations (from 0  $\mu$ M to 800  $\mu$ M). Cell viability ( $CC_{50}$ ) was  
95 monitored after 72 h of treatment (Table 1) as described in Materials and Methods. Only Ade  
96 showed a modest cytotoxicity in the range of concentrations tested.

97 To quantify the inhibition of HCV infectious progeny production in the presence of nucleosides  
98 ( $IC_{50}$ ), Huh-7.5 reporter cells were infected with HCV p0 at a multiplicity of infection (m.o.i.) of  
99 0.05-0.1  $TCID_{50}$  per cell in the presence of increasing concentrations of the corresponding  
100 nucleoside, and infectious progeny production was measured as described in Materials and  
101 Methods. A decrease in the production of HCV infectious progeny was observed for Gua and  
102 Ade, whereas Cyt and Uri did not show any effect (Table 1). These data yield a therapeutic  
103 index (TI), defined as  $CC_{50}/IC_{50}$ , of 5.9 and  $\geq 4.9$  for Ade and Gua, respectively (Table 1).

104 To further explore the effect of ribonucleosides on HCV replication, HCV p0 was subjected to 5  
105 serial passages in Huh-7.5 reporter cells, using an initial m.o.i. of 0.05  $TCID_{50}$  per cell, both in  
106 the absence and in the presence of ribonucleosides at 500  $\mu$ M and 800  $\mu$ M (Fig 1). Results show  
107 a consistent decrease in progeny infectivity as a result of Gua treatment (Fig 1A and 1B), but a  
108 sustained viral replication in the presence of Ade, Cyt or Uri (Fig 1C, D). In the presence of 500  
109  $\mu$ M Gua, a decrease in infectivity was detected although only one of the four replicates yielded  
110 values below the detection limit (Fig 1A). A sustained drop in HCV infectivity by Gua 800  $\mu$ M  
111 was achieved, which became undetectable between passages 2 and 4 in all replicates (Fig 1B).  
112 Therefore, Gua was the only nucleoside that showed antiviral effect without cytotoxicity.

113 Next, we analyzed the effect of treatment with Gua, Ade, Cyt, and Uri in a surrogate single  
114 cycle infection model, taking advantage of spread-deficient bona fide HCV virions bearing a  
115 luciferase reporter gene (HCVtcp). This system recapitulates early stages of the infection

116 including viral entry, primary translation and genome replication, overall efficiency of which is  
117 proportional to reporter gene activity [12]. The results (Fig 2A) show that a selective HCV entry  
118 inhibitor, hydroxyzine, strongly interferes with reporter gene accumulation, as previously  
119 documented [13] (Figure 2A). Of the four natural nucleosides, only Gua exerted a significant  
120 inhibitory role, as shown by reduced luciferase levels in these cells (Figure 2A), and suggesting  
121 that an early step of the infection preceding viral assembly is significantly inhibited by Gua. To  
122 further dissect the impact of Gua on HCV replication, we analyzed the effect of Gua, Ade, Cyt  
123 and Uri treatment at different times in the replication of a dicistronic subgenomic genotype 2a  
124 (JFH-1) replicon bearing a luciferase reporter gene [12]. The objective was to analyze if the  
125 effect took place at the level of IRES-dependent translation (5 h post-transfection) or during  
126 RNA replication (24 and 48 h post-transfection) [13]. The results (Fig 2B) show that there are  
127 no differences among the different treatment points at 5 h post-transfection, which excludes an  
128 effect on HCV IRES-dependent RNA translation or any spurious interference with reporter gene  
129 expression. However, Gua-treated cells showed a statistically significant 12- and 5-fold  
130 reduction in RNA replication at 24 and 48 hours post-transfection respectively (Figure 2B). A  
131 modest ( $\pm 2$ -fold) but significant reduction was also observed in Ade-treated cells. The fact that  
132 Ade treatment does not interfere with HCVtcp (trans-complemented HCV particles) infection  
133 suggests that only Gua affects significantly with HCV infection by interfering with viral RNA  
134 replication, downstream of viral entry and primary translation.

135

### 136 **Effect of Gua on a high fitness HCV population**

137 The HCV p100 virus [HCV p0 passaged 100 times in Huh-7.5 reporter cells], shows a relative  
138 fitness that is 2.2 times higher than that of the HCV p0 parental population [14]. Since viral  
139 fitness can influence the response of the virus to antiviral agents [15-17], HCV p100 was used  
140 to study the response of a high fitness HCV to Gua. For this, HCV p100 was subjected to 5  
141 serial passages in Huh-7.5 reporter cells using an initial m.o.i. of 0.05 TCID<sub>50</sub> per cell, both in  
142 the absence and in the presence of Gua 500 or 800  $\mu$ M. The results show a sustained drop in



143 infectivity of 15 and 736 times along the passages as a result of treatment with 500 and 800  $\mu$ M  
144 Gua, respectively. However, no decrease of infectivity below the limit of detection was  
145 observed throughout the five passages in any of the replicates (Fig 1E). Only the decrease in  
146 progeny production in the presence of 800  $\mu$ M reached statistical significance (Fig 1E). Thus,  
147 the results showed increased resistance of HCV p100 to Gua compared to HCV p0 (compare  
148 Fig 1A, 1B, and 1E) as was previously observed with several antiviral drugs [16,17].

149

### 150 **Effect of Gua on the replication of other RNA viruses**

151 To determine the specificity of the antiviral action exerted by Gua on HCV and to rule out  
152 nonspecific effects that could affect any virus, comparative experiments were conducted with  
153 foot-and-mouth disease virus (FMDV), lymphocytic choriomeningitis virus (LCMV), and  
154 vesicular stomatitis virus (VSV). First, the  $CC_{50}$  values of Gua, Ade, Cyt, and Uri were  
155 determined for BHK-21 cells, as described in Materials and Methods. The values obtained  
156 (Table 2) indicate no detectable cytotoxicity of Gua, Cyt and Uri, and a  $CC_{50}$  value of  $391 \pm 68$   
157  $\mu$ M for Ade. To determine the  $IC_{50}$  values of these nucleosides, BHK-21 cells were infected  
158 with FMDV, LCMV, and VSV, at an initial m.o.i. of 0.05  $TCDI_{50}$  per cell in the presence of  
159 increased nucleoside concentrations and the production of infectious progeny was measured.  
160 The values obtained (Table 2) show that all nucleosides lacked inhibitory profile for FMDV. In  
161 contrast, purines were inhibitory for VSV, while all nucleosides were inhibitory for LCMV.  
162 However, the  $IC_{50}$  values were very high and the therapeutic indexes (TI) were consequently  
163 low (Table 2).

164 As an additional control for the specificity of HCV inhibition by Gua, the response of VSV,  
165 FMDV and LCMV to nucleoside treatment in serial infections was studied. BHK-21 cells were  
166 infected with FMDV, LCMV, and VSV with an initial m.o.i. of 0.05  $TCDI_{50}$  per cell, and were  
167 subjected to 3 passages both in the absence and presence of nucleosides at a final concentration  
168 of 800  $\mu$ M. The analysis of the viral populations in passage 3 showed no statistically significant  
169 difference from the viral titer obtained in the absence of treatment (Fig 3A-C). Therefore, the

170 results show that the only differences found were those of HCV treatment with Gua at 800  $\mu$ M  
171 (Fig 1A-B). Finally, to rule out that the inhibitory effect of Gua on HCV was solely due to the  
172 action of the nucleoside on the human hepatoma cells used in the experiments, we examined the  
173 production of VSV viral progeny in Huh-7.5 reporter cells which this virus also productively  
174 infects. High viral titers in the presence of 800  $\mu$ M Gua were obtained for VSV, confirming a  
175 lack of antiviral activity of Gua against this virus also in Huh-7.5 reporter cells (Fig 3D).

176

### 177 **Effect of guanosine on HCV NS5B activity**

178 To analyze the mechanism by which Gua inhibits HCV replication we tested the effect of  
179 increasing Gua concentrations on HCV polymerase activity *in vitro*. A 570 nt RNA fragment  
180 corresponding to the E1/E2 region of the HCV genome [18] was replicated by HCV  
181 recombinant NS5B $\Delta$ 21 in the presence of ATP, CTP, GTP, and UTP, and at increasing  
182 concentrations of Gua (Fig 4A). NS5B polymerase activity increased with Gua concentration up  
183 to 500  $\mu$ M. Even at 1 mM Gua, the RNA polymerase activity was similar to that obtained in  
184 absence of Gua. Only at very high Gua concentration (10 mM) the RNA polymerase activity  
185 showed a significant reduction (Fig 4A). Similar results were obtained using the 19-mer  
186 oligonucleotide LE19 (Fig 4B). Therefore, according to this *in vitro* RNA synthesis assay, the  
187 inhibition of HCV progeny production by Gua cannot be attributed to direct inhibition of the  
188 HCV RNA polymerase.

189

### 190 **Effect of guanosine on intracellular nucleotide pools**

191 To investigate whether HCV replication inhibition by Gua could be related to alterations in di-  
192 and triphosphate ribonucleoside intracellular concentrations, the level of NTPs and NDPs in  
193 Huh-7.5 reporter cells was determined in the absence of Gua and after 72 h of treatment with  
194 500 or 800  $\mu$ M Gua. Intracellular nucleoside triphosphate concentrations did not change when  
195 the cells were treated with 500  $\mu$ M Gua. However, 800  $\mu$ M Gua treatment resulted in a

196 statistically significant 2-fold increase (range from 2- to 2.2-fold) in intracellular concentration  
197 of all NTPs (Fig 5A). In the case of NDPs a significant increase of 1.7- to 4.1-fold was observed  
198 in cells treated with 500  $\mu$ M Gua (Fig 5B). Treatment with 800  $\mu$ M Gua resulted in an increase  
199 of the concentration (2.1- to 5.4-fold) of all NDP's (Fig 5B). Therefore, the presence of Gua in  
200 the culture medium increased the intracellular levels of nucleoside di- and tri-phosphates  
201 (Supplementary Table). The lowest nucleotide concentration was obtained for CDP and CTP  
202 independently of the treatment with Gua.

203

#### 204 **Effect of nucleoside di- and triphosphate imbalance on HCV NS5B activity *in vitro***

205 To explore if changes in nucleotide concentrations might affect HCV polymerase activity, we  
206 performed *in vitro* RNA polymerization experiments with recombinant NS5B $\Delta$ 21 in the  
207 presence of increasing concentrations of NTPs or NDPs. CTP and CDP were not included in the  
208 analyses because they showed small intracellular variations (Supplementary Table) and CTP  
209 was chosen as the carrier of the radioisotope. *De novo* (DN), primer extension (PE) and  
210 template switching (TS) polymerase activities were measured in the presence of increasing  
211 concentrations of the corresponding triphosphate nucleosides (Fig 6). A high UTP concentration  
212 of 1 mM slightly but significantly decreased primer extension activity (Fig 6A). However, the  
213 main effect of NTP concentration was on the *de novo* RNA synthesis, with a significant  
214 decrease at high ATP concentration (Fig 6B), and a significant increase at high GTP  
215 concentration (Fig 6C). The increase in the *de novo* RNA synthesis was accompanied by an  
216 increase of template switching (Fig 6C).

217 Since increasing concentrations of Gua also altered the intracellular NDP concentrations (Fig 5),  
218 we investigated if the presence of increasing concentration of NDPs might affect the NS5B  
219 RNA polymerase activity *in vitro*. DN, PE, TS activities were measured in the presence of  
220 increasing concentrations of the corresponding diphosphate nucleosides at a fixed nucleoside-  
221 triphosphate concentration (Fig 7). The main effect of the presence of NDP was on the *de novo*

222 RNA synthesis, with a significant decrease at high ADP and GDP concentrations. Differences in  
223 primer extension and template switching did not reach statistical significance (Fig 7).

224

### 225 **Mutational effects of guanosine**

226 To determine if Gua-related nucleotide pool effects were associated with the mutation repertoire  
227 exhibited by HCV during replication in Huh-7.5 cells, the mutant spectrum of the genomic  
228 region spanning the last 49 nucleotides of the NS4B gene and the first 490 nucleotides of the  
229 NS5A gene, was analyzed using molecular cloning and Sanger sequencing. Following three  
230 passages in absence or presence of Gua, the maximum mutation frequency resulted in a  
231 significant increase in the HCV populations passaged in the presence of Gua ( $p < 0.0001$  and  
232  $p = 0.01$  for Gua 500  $\mu\text{M}$ , and Gua 800  $\mu\text{M}$ , respectively;  $\chi^2$  test) (Table 3). A hallmark of virus  
233 extinction by lethal mutagenesis is the decrease of specific infectivity (the ratio between viral  
234 infectivity and the amount of genomic viral RNA) [7]. Extinction by Gua occurred with a 2.8-  
235 fold to 11.8-fold decrease of specific infectivity in the first two passages in the presence of the  
236 compared drug, as quantified by infectivity and viral RNA in samples of the cell culture  
237 supernatants (Fig 8), suggesting that an increase in polymerase error rate was involved. The  
238 most remarkable change was that replication in the presence of Gua increased significantly the  
239 number of indels in the heteropolymeric genomic regions of the mutant spectrum (Table 4).  
240 Indels in homopolymeric regions—consisting of at least three successive identical nucleotides—  
241 were not considered because control experiments revealed that they can be amplification  
242 artifacts [19]. No indels were detected in the 53 molecular clones derived from the population  
243 passaged in the absence of Gua. In sharp contrast, 10 deletions and 2 insertions were present in  
244 the 64 molecular clones retrieved from the population passaged in the presence of 500  $\mu\text{M}$  Gua,  
245 and 5 deletions in 68 molecular clones from the population passaged in the presence of 800  $\mu\text{M}$   
246 Gua (Table 4). The difference in the number of deletions is highly significant for the  
247 populations passaged in the presence of 500  $\mu\text{M}$  and 800  $\mu\text{M}$  Gua ( $p < 0.001$ ; test  $\chi^2$ ). The size  
248 of the deletions ranged from 1 to 46 nucleotides, some were found in a single clone, others in

249 several clones, and none of the deletions and insertions were in phase; they all generated a  
250 premature STOP codon (Table 4 and Fig 9). Therefore, the anti-HCV effect of Gua, exerted via  
251 nucleotide-mediated alterations of polymerase activity, is associated with the generation of  
252 multiple deletions during HCV replication.

253

254

255

## 256 Discussion

257 Nucleoside derivatives are the most important family of drugs targeting viral polymerases, but  
258 the antiviral capacity of natural nucleosides has not been described [5]. Interestingly, we  
259 observed an inhibitory effect of Gua when it was used in experiments to analyze the impact of  
260 mycophenolic acid and ribavirin on HCV progeny production [11]. Here, we document  
261 inhibition of HCV replication by Gua in single and serial infections of Huh-7.5 cells that led to  
262 loss of infectivity without significant toxicity for the host cells. The antiviral action of Gua was  
263 also exerted on high fitness HCV, albeit without loss of infectivity after 5 passages in the  
264 presence of Gua, in agreement with the drug resistance phenotype displayed by high fitness  
265 HCV (Fig 1) [14-17]. The antiviral effect of Gua was not observed for FMDV in BHK-21 cells  
266 or for LCMV and VSV in Huh-7.5 cells (Fig 3).

267 RNA synthesis by NS5B $\Delta$ 21 was not significantly affected by Gua concentrations up to 1 mM.  
268 Therefore, the inhibition of virus progeny production is unlikely to be the result of direct  
269 polymerase inhibition by Gua. This result is consistent with previous work that showed the  
270 ability of NS5B to initiate RNA synthesis with this nucleoside [20]. In contrast to Gua, altered  
271 intracellular nucleotide concentrations affected the activity of NS5B, in particular an alteration  
272 of the *de novo* RNA synthesis by the GTP/GDP and/or ATP/ADP balances (Fig 7). The NS5B  
273 protein has an allosteric binding site of GTP and the balance between NDP and NTP might  
274 modulate RNA synthesis through this site [21-23].

275 Some GTP-dependent proteins play a role in the HCV replication cycle. They include proteins  
276 involved in virus entry into the cells (i.e HRas), proteins involved in translation (i.e.the eIF5B  
277 factor), or in replication (i.e. GBF1) [24-26]. The GTP-dependent Rab18 protein, which is  
278 located in the lipid droplets, is involved in capturing proteins such as viral protein NS5A into  
279 the replication complex [27]. The observed increase in GTP concentration in Gua-treated cells  
280 would not adversely affect the functionality of these proteins.

281 Some antiviral drugs exert their activity through alterations in the intracellular nucleotide pools  
282 [6,28]. Treatment of Huh-7.5 reporter cells with Gua produced an overall increase of

283 intracellular nucleoside di- and tri-phosphate concentrations (Fig 5). An increase of ATP would  
284 be beneficial for virus replication as ATP increments have been associated with the formation of  
285 the HCV replication complex [29]. Using previously reported cell volume values for HepG2  
286 cell line (20) (ranging from 2.54 pL to 2.96 pL), the intracellular ATP concentration in Gua-  
287 treated Huh7.5-reporter cells would be in the range of 2 mM (Supplementary Table), similar to  
288 the previously described values in the HCV replication sites [29].

289 Intracellular concentration of mono- and di-phosphate nucleotides also modulates metabolic  
290 pathways critical for virus replication. For example, HCV proteins NS4B and NS5A inhibit the  
291 cellular protein AMP-activated protein kinase (AMPK) [30]. Inhibition of AMPK induces the  
292 synthesis of fatty acids and cholesterol that are of vital importance in the HCV replication sites.  
293 ADP activates AMPK [31,32], and the inactivation of AMPK by NS4B and NS5A is ineffective  
294 when ADP is increased [30]. As a result, there is no longer accumulation of fatty acids and  
295 cholesterol, and viral replication stops. Metformin activates AMPK by increasing AMP and  
296 ADP, and this effect has been associated with inhibition of HCV replication. [31,33,34]. The  
297 AMPK dissociation constant for ADP is in the range of 1.3-1.5  $\mu$ M [32]. Therefore, the increase  
298 of the ADP concentration from 40  $\mu$ M to 200  $\mu$ M (Fig 4 and Supplementary Table) could be  
299 preventing, at least in part, inactivation of AMPK. Whether ATP acts only as a substrate or it  
300 also exerts some regulatory role needs to be further analyzed.

301 Defective viral genomes are increasingly recognized as players in virus-host interactions  
302 (reviewed in [35]). They are associated with multiple types of genetic lesions ranging from  
303 point mutations to large deletions. Deletions can result from polymerase slippage over one or  
304 several nucleotides, but the environmental factors that may trigger their occurrence are  
305 unknown. Generation of RNA deletions has been documented during *in vitro* replicase copying  
306 of viral RNAs [36], and deletions have been observed in many viruses [35,37-40]. Template  
307 switching is considered as the primary mechanism of copy-choice recombination of poliovirus  
308 in cells [41], and the primary mechanism of poly(rU) RNA synthesis by poliovirus polymerase  
309 [42]. The observed increase of indels in the presence of high GTP concentrations may be linked

310 to the enhanced template switching observed with the HCV polymerase *in vitro*. Despite limited  
311 information on the origin of HCV defective genomes, there is solid evidence of the implication  
312 of defective viral genomes in the interference with replication of their standard infectious  
313 counterparts [43], including a contribution to viral extinction by lethal mutagenesis [44,45].  
314 They also play a role as stimulators of antiviral responses [46], and as mediators of virus  
315 attenuation and persistence [40,47,48], among other functions [35].

316 Defective genomes have been described for HCV, including in-frame deletion mutants. They  
317 are present in patient plasma, exosomes and liver biopsies and they may play regulatory roles  
318 during viral replication [49-53]. Little is known about the molecular mechanisms of generation  
319 of defective genomes despite detailed accounts of their high m.o.i.-dependent selection based on  
320 molecular complementation with standard genomes [35]. Our results provide evidence of a  
321 mechanism of generation of defective HCV genomes fuelled by nucleoside pool effects on HCV  
322 polymerase activity. This is accompanied by a significant reduction of the specific infectivity of  
323 the passaged viral pools, demonstrating the increasing presence of non-infectious viral genomes  
324 in the supernatants of Gua-treated cells. In addition to unveiling a possible mechanism of  
325 generation of defective HCV genomes, our results open the possibility that the alteration of  
326 cellular metabolic pathways may be a complementary strategy to the action of antiviral agents  
327 to produce reductions in viral load and promote the extinction of HCV.

328



329 **Material and methods.**

330 **Reagents and plasmids.**

331 Nucleosides Ade, Cyt, Gua, and Uri, as well as nucleoside di- and tri-phosphates were  
332 purchased from Sigma-Aldrich. Plasmid pNS5BΔ21 encoding the HCV NS5B that lacks the C-  
333 terminal 21 hydrophobic amino acids to enhance solubility has been described previously [54].  
334 The resulting expression vector allows the expression of a tagged NS5BΔ21 with six histidine  
335 residues at its C terminus to aid in protein purification.

336 **Cells and viruses.**

337 The origin of Huh 7.5, Huh 7-Lunet, Huh-7.5 reporter cell lines and procedures used for cell  
338 growth in Dulbecco's modification of Eagle's medium (DMEM), have been described [11]. Cell  
339 lines were incubated at 37°C and 5% CO<sub>2</sub>. We used the following viruses in the experiments:  
340 HCV p0, obtained from HCVcc [Jc1FLAG2(p7-nsGluc2A)] (genotype 2a) and GNN  
341 [GNNFLAG2(p7-nsGluc2A)] (a replication-defective virus with a mutation in the NS5B RNA-  
342 dependent RNA polymerase) [11,55]. Mock-infected cells maintained in parallel with the  
343 infected cultures were prepared to control the absence of contaminations; no infectivity in the  
344 mock-infected cultures was identified in the experiments.

345 Trans-encapsidated HCV virions (HCVtcp) were produced by electroporation into packaging  
346 cells of a subgenomic, dicistronic HCV replicon bearing a luciferase gene, as previously  
347 described [12]. Supernatants of the electroporated cells were titrated to determine the optimal  
348 dose rendering detectable luciferase activity at 48 hours post-inoculation. The same subgenomic  
349 replicon was used for lipofection experiments, using lipofectamine2000 transfection reagent as  
350 previously described [13].

351

352 **Production of viral progeny and titration of infectivity.**

353 The procedures used to obtain the initial virus HCV p0 and for serial infections of the hepatoma  
354 Huh-7.5 reporter cells have been described [14]. Briefly, electroporation of Huh-7 Lunet cells

355 was performed with 10  $\mu$ g of the transcript of HCVcc (Jc1 or the negative control GNN) (260  
356 volts, 950  $\mu$ F). Then, electroporated cells were passaged every 3–4 days before cells became  
357 confluent; passages were continued until 30 days post-electroporation. Subsequently, the cell  
358 culture supernatants were pooled to concentrate the virus 20 times using 10,000 MWCO spin  
359 columns (Millipore), and aliquots were stored at  $-70^{\circ}\text{C}$  [14]. For titration of HCV infectivity,  
360 cell culture supernatants were serially diluted and applied to Huh-7.5 cells. After 3 days post-  
361 infection the cell monolayers were washed with PBS, fixed with ice-cold methanol, and stained  
362 with anti-NS5A monoclonal antibody 9E10 [14].

### 363 **Toxicity test and inhibitory concentration.**

364 The  $\text{CC}_{50}$  was calculated by seeding 96-well plates with Huh-7.5 cells and exposing them to the  
365 compound under study during 72 hours. MTT [3-(4,5-dimethylthiazol-2-yl)-2,5-  
366 diphenyltetrazolium bromide] was added at 500  $\mu\text{g}/\text{ml}$ ; after 4 h crystals were dissolved with  
367 100  $\mu\text{l}$  of DMSO and the O.D. measured at 550 nm; 50% cytotoxicity was calculated from  
368 quadruplicate determinations [11].

369  $\text{IC}_{50}$  values were calculated relative to the controls without treatment (defined as 100%  
370 infectivity) [56]. Determinations were performed in triplicate.

### 371 **RNA extraction, cDNA synthesis, PCR amplification, and nucleotide sequencing.**

372 Intracellular RNA was obtained from infected cells using the Qiagen RNeasy kit (Qiagen,  
373 Valencia, CA, USA). RNA from cell lysates or cell culture supernatants was extracted using the  
374 Qiagen QIAamp viral RNA mini kit (Qiagen, Valencia, CA, USA). Reverse transcription (RT)  
375 of different HCV genomic regions was performed using avian myeloblastosis virus (AMV)  
376 reverse transcriptase (Promega), and subsequent PCR amplification was carried out using  
377 AccuScript (Agilent Technologies), with specific primers. Primers for the HCV amplification  
378 and the sequencing have been described [11,14,17,19]. Agarose gel electrophoresis was used to  
379 analyze the amplification products, using HindIII-digested  $\Phi$ -29 DNA as a molecular mass  
380 standard. In parallel, mixtures without template RNA were reverse transcribed and amplified to  
381 monitor the absence of cross-contamination by template nucleic acids. Nucleotide sequences of

382 HCV RNA were determined on the two strands of the cDNA copies [11,55]; only mutations  
383 detected in the two strands were considered. To analyze the complexity of mutant spectra by  
384 molecular cloning and Sanger sequencing, HCV RNA was extracted and subjected to RT-PCR  
385 to amplify the NS5A-coding regions, as has been previously described [11]. Amplifications  
386 with template preparations diluted 1:10 and 1:100 were performed to ensure that an excess of  
387 template in the amplifications was used in the mutant spectrum analysis; the molecular cloning  
388 was performed from the undiluted template only when the 1:100-diluted template produced also  
389 a DNA band; this procedure avoids complexity biases due to redundant amplifications of the  
390 same initial RNA templates [11]. Control analyses to confirm that mutation frequencies were  
391 not affected by the basal error rate during amplification have been previously described [57].  
392 Amplified DNA was ligated to the vector pGEM-T (Amersham) and used to transform  
393 *Escherichia coli* DH5 $\alpha$ ; individual colonies were taken for PCR amplification and nucleotide  
394 sequencing, as previously described [56].

395

#### 396 **NDP and NTP pool analysis.**

397 The procedure used has been previously described [11]. Briefly, Huh-7.5 cells ( $2 \times 10^6$  cells)  
398 were washed with PBS and incubated with 900  $\mu$ l of 0.6 M trichloroacetic acid on ice for 10  
399 min. A precooled mixture of 180  $\mu$ l of Tri-n-octylamine (Sigma) and 720  $\mu$ l of Uvasol® (1,1,2-  
400 trichlorotrifluoroethane, Sigma) was added to the 900  $\mu$ l extract, vortexed for 10 s, centrifuged  
401 30 s at  $12,000 \times g$  at 4 °C, and stored at  $-80$  °C prior to analysis. One hundred  $\mu$ l samples were  
402 applied to a Partisil 10 SAX analytical column (4.6 mm $\times$ 250 mm) (Whatman) with a Partisil 10  
403 SAX guard cartridge column (4.6 $\times$ 30 mm) (Capital HPLC) using an Alliance 2695 HPLC  
404 system connected to a 2996 photodiode array detector (Waters). NDP and NTP were separated  
405 at a eluent flow rate of 0.8 ml/min and detected with ultraviolet light at a wavelength of 254 nm.  
406 The column was pre-equilibrated with 60 ml of 7 mM NH<sub>4</sub>H<sub>2</sub>PO<sub>4</sub>, pH 3.8 (buffer A). The  
407 separation program started with 22.5 min of an isocratic period with buffer A, continued with a  
408 linear gradient of 112.5 min to the high concentration buffer 250 mM NH<sub>4</sub>H<sub>2</sub>PO<sub>4</sub>, 500 mM KCl,  
409 pH 4.5 (buffer B) and ended with an isocratic period of 37.5 min with buffer B. A processing

410 method was done using the Waters Empower™ Chromatography Data Software. To this end, 50  
411 µl of 20 pmol/µl UTP, CTP, ATP and GTP (Jena Bioscience), were separated prior to sample  
412 analysis. The HPLC analysis did not separate rNTPs from dNTPs, or rNDPs from dNDPs.  
413 However, since the absolute concentration of rNTPs and rNDPs is several orders of magnitude  
414 greater than that of dNTPs dNDPs, we consider the value obtained as the concentration of  
415 rNTPs and rNDPs. Determinations were carried out with two independent biological samples,  
416 each one in triplicate for NDPs and NTPs. The amount of each nucleoside in cell extracts was  
417 normalized relative to the number of cells.

#### 418 **Quantification of HCV RNA.**

419 Real time quantitative RT-PCR was performed with the Light Cycler RNA Master SYBR Green  
420 I kit (Roche), following the manufacturer's instructions, as previously described [14]. The 5'-  
421 UTR non-coding region of the HCV genome was amplified using as primers oligonucleotide  
422 HCV-5UTR-F2 (5'- TGAGGAACTACTGTCTTCACGCAGAAAG; sense orientation; the 5'  
423 nucleotide corresponds to HCV genomic residue 47), and oligonucleotide HCV-5UTR-R2 (5'-  
424 TGCTCATGGTGCACGGTCTACGAG; antisense orientation; the 5' nucleotide corresponds to  
425 HCV genomic residue 347). Quantification was relative to a standard curve obtained with  
426 known amounts of HCV RNA, obtained by *in vitro* transcription of plasmid GNN DNA [55].  
427 Reaction specificity was monitored by determining the denaturation curve of the amplified  
428 DNAs. Mixture without template RNA and RNA from mock-infected cells were run in parallel  
429 to ascertain absence of contamination with undesired templates.

#### 430 **NS5BΔ21 polymerase expression and purification.**

431 NS5B from strain pJ4-HC with a deletion of 21 aa at the C-terminal end (NS5BΔ21) was  
432 obtained as previously described [54,58]. This truncated protein displays polymerase activities  
433 that were not distinguished from those of the full-length enzyme [59]. Briefly, NS5BΔ21 was  
434 overexpressed in BL21DE3 Rosetta bacteria by IPTG induction and purified by affinity  
435 chromatography in a Ni-NTA column. Aliquots of the purest and most concentrated protein  
436 samples were adjusted to 50% glycerol and stored at -80°C until use. All purification processes

437 were monitored by SDS-PAGE and Coomassie brilliant blue staining. Protein was quantified by  
438 SDS-PAGE gel imaging and protein determination using the Bradford assay.

#### 439 ***In vitro* RdRP replication assays.**

440 RNA polymerase assays were carried out using two different RNA substrates, the symmetric  
441 substrate LE-19 (sequence 5' UGUUAUAAUAAUUGUAUAC 3'), which is capable of primer-  
442 extension (PE), *de novo* initiation (DN), and template switching (TS) [54,58], and an RNA  
443 fragment encompassing HCV E1/E2 region (570 nt) [18]. Except when indicated otherwise,  
444 template RNA was pre-incubated for 15 minutes in a reaction mixture containing 20 mM  
445 MOPS, pH 7.3, 35 mM NaCl, 5 mM MnCl<sub>2</sub>, 100 nM NS5B and GTP at the indicated  
446 concentration for each experiment. Reactions were started by adding 1 μCi of α[<sup>32</sup>P]CTP (3000  
447 Ci mmol, PerkinElmer Life Sciences) and nucleoside-triphosphate as indicated in each  
448 experiment. When appropriate, reactions were performed in the presence of increasing  
449 concentrations of nucleotide diphosphates. Reactions were carried out in a final volume of 10  
450 μl, at room temperature for 30 minutes, and stopped using EDTA/formamide loading buffer.  
451 E1/E2 products were resolved using 1% agarose gel electrophoresis. Agarose gels were dried in  
452 an electrophoresis gel dryer (BioRad). LE19 products were resolved using denaturing  
453 polyacrylamide (23% PAA, 7 M urea) gel electrophoresis. Gels were exposed to  
454 phosphorimager screens and scanned with a Typhoon 9600 phosphorimager (Molecular  
455 Dynamics). Sample quantification was performed from parallel experiments. Band volume  
456 values were obtained by using the ImageQuant software provided with the apparatus (GE  
457 Healthcare).

#### 458 **Statistical analyses.**

459 The statistical significance of differences between mutation frequencies was evaluated by the  
460 chi-square test. Statistical comparisons among groups were performed with Student's T-tests.  
461 Unless indicated otherwise, the statistical significance is indicated by asterisks: \* p<0.05; \*\*  
462 p<0.005; \*\*\* p<0.0005.

463 **Acknowledgements.**

464 C.P. is supported by the Miguel Servet program of the Instituto de Salud Carlos III  
465 (CP14/00121) cofinanced by the European Regional Development Fund (ERDF). CIBERehd  
466 (Centro de Investigación en Red de Enfermedades Hepáticas y Digestivas) is funded by Instituto  
467 de Salud Carlos III. The work at CBMSO was supported by grants SAF2014-52400-R from  
468 Ministerio de Economía y Competitividad (MINECO), SAF2017-87846-R, BFU2017-91384-  
469 EXP from Ministerio de Ciencia, Innovación y Universidades (MICIU), PI18/00210 from  
470 Instituto de Salud Carlos III, S2013/ABI-2906, (PLATESA from Comunidad de  
471 Madrid/FEDER) and S2018/BAA-4370 (PLATESA2 from Comunidad de Madrid/FEDER).  
472 The team at CBMSO belongs to the Global Virus Network (GVN). The work in Albacete was  
473 supported by grants SAF2016-80451-P, EQC2018-004420-P, and EQC2018-004631-P from  
474 MICIU, and by Plan Propio of the University of Castilla-La Mancha. The work in Malaga was  
475 supported by Plan Propio of the University of Málaga. Institutional grants from the Fundación  
476 Ramón Areces and Banco Santander to the CBMSO are also acknowledged. Piet de Groot is  
477 acknowledged for critical reading the manuscript.

478

479 **References.**

- 480 1. Scheel TK, Rice CM (2013) Understanding the hepatitis C virus life cycle paves the way for  
481 highly effective therapies. *Nat Med* 19: 837-849.
- 482 2. European Association for the Study of the Liver. Electronic address eee, European  
483 Association for the Study of the L (2018) EASL Recommendations on Treatment of  
484 Hepatitis C 2018. *J Hepatol* 69: 461-511.
- 485 3. Lombardi A, Mondelli MU, Hepatitis ESGfV (2019) Hepatitis C: Is eradication possible? *Liver*  
486 *Int* 39: 416-426.
- 487 4. Hlaing NK, Banerjee D, Mitrani R, Arker SH, Win KS, et al. (2016) Hepatitis C virus therapy  
488 with peg-interferon and ribavirin in Myanmar: A resource-constrained country. *World J*  
489 *Gastroenterol* 22: 9613-9622.
- 490 5. De Clercq E, Li G (2016) Approved Antiviral Drugs over the Past 50 Years. *Clin Microbiol Rev*  
491 29: 695-747.
- 492 6. Wray SK, Gilbert BE, Noall MW, Knight V (1985) Mode of action of ribavirin: effect of  
493 nucleotide pool alterations on influenza virus ribonucleoprotein synthesis. *Antiviral*  
494 *Res* 5: 29-37.
- 495 7. Perales C, Gallego I, de Avila AI, Soria ME, Gregori J, et al. (2019) The increasing impact of  
496 lethal mutagenesis of viruses. *Future Med Chem* 11: 1645-1657.
- 497 8. Asahina Y, Izumi N, Enomoto N, Uchihara M, Kurosaki M, et al. (2005) Mutagenic effects of  
498 ribavirin and response to interferon/ribavirin combination therapy in chronic hepatitis  
499 C. *J Hepatol* 43: 623-629.
- 500 9. Cuevas JM, Gonzalez-Candelas F, Moya A, Sanjuan R (2009) Effect of ribavirin on the  
501 mutation rate and spectrum of hepatitis C virus in vivo. *J Virol* 83: 5760-5764.
- 502 10. Dietz J, Schelhorn SE, Fitting D, Mihm U, Susser S, et al. (2013) Deep sequencing reveals  
503 mutagenic effects of ribavirin during monotherapy of hepatitis C virus genotype 1-  
504 infected patients. *J Virol* 87: 6172-6181.
- 505 11. Ortega-Prieto AM, Sheldon J, Grande-Perez A, Tejero H, Gregori J, et al. (2013) Extinction of  
506 hepatitis C virus by ribavirin in hepatoma cells involves lethal mutagenesis. *PLoS One* 8:  
507 e71039.
- 508 12. Steinmann E, Brohm C, Kallis S, Bartenschlager R, Pietschmann T (2008) Efficient trans-  
509 encapsidation of hepatitis C virus RNAs into infectious virus-like particles. *J Virol* 82:  
510 7034-7046.
- 511 13. Mingorance L, Castro V, Avila-Perez G, Calvo G, Rodriguez MJ, et al. (2018) Host  
512 phosphatidic acid phosphatase lipin1 is rate limiting for functional hepatitis C virus  
513 replicase complex formation. *PLoS Pathog* 14: e1007284.
- 514 14. Perales C, Beach NM, Gallego I, Soria ME, Quer J, et al. (2013) Response of hepatitis C virus  
515 to long-term passage in the presence of alpha interferon: multiple mutations and a  
516 common phenotype. *J Virol* 87: 7593-7607.
- 517 15. Gallego I, Gregori J, Soria ME, Garcia-Crespo C, Garcia-Alvarez M, et al. (2018) Resistance of  
518 high fitness hepatitis C virus to lethal mutagenesis. *Virology* 523: 100-109.
- 519 16. Gallego I, Sheldon J, Moreno E, Gregori J, Quer J, et al. (2016) Barrier-Independent, Fitness-  
520 Associated Differences in Sofosbuvir Efficacy against Hepatitis C Virus. *Antimicrob*  
521 *Agents Chemother* 60: 3786-3793.
- 522 17. Sheldon J, Beach NM, Moreno E, Gallego I, Pineiro D, et al. (2014) Increased replicative  
523 fitness can lead to decreased drug sensitivity of hepatitis C virus. *J Virol* 88: 12098-  
524 12111.
- 525 18. Geller R, Estada U, Peris JB, Andreu I, Bou JV, et al. (2016) Highly heterogeneous mutation  
526 rates in the hepatitis C virus genome. *Nat Microbiol* 1: 16045.
- 527 19. Moreno E, Gallego I, Gregori J, Lucia-Sanz A, Soria ME, et al. (2017) Internal Disequilibria  
528 and Phenotypic Diversification during Replication of Hepatitis C Virus in a  
529 Noncoevolving Cellular Environment. *J Virol* 91: pii: e02505-02516.

- 530 20. Ranjith-Kumar CT, Gutshall L, Kim MJ, Sarisky RT, Kao CC (2002) Requirements for de novo  
531 initiation of RNA synthesis by recombinant flaviviral RNA-dependent RNA polymerases.  
532 *J Virol* 76: 12526-12536.
- 533 21. Ranjith-Kumar CT, Kim YC, Gutshall L, Silverman C, Khandekar S, et al. (2002) Mechanism of  
534 de novo initiation by the hepatitis C virus RNA-dependent RNA polymerase: role of  
535 divalent metals. *J Virol* 76: 12513-12525.
- 536 22. Cai Z, Yi M, Zhang C, Luo G (2005) Mutagenesis analysis of the rGTP-specific binding site of  
537 hepatitis C virus RNA-dependent RNA polymerase. *J Virol* 79: 11607-11617.
- 538 23. Chinnaswamy S, Murali A, Li P, Fujisaki K, Kao CC (2010) Regulation of de novo-initiated  
539 RNA synthesis in hepatitis C virus RNA-dependent RNA polymerase by intermolecular  
540 interactions. *J Virol* 84: 5923-5935.
- 541 24. Lebsir N, Goueslain L, Farhat R, Callens N, Dubuisson J, et al. (2019) Functional and Physical  
542 Interaction between the Arf Activator GBF1 and Hepatitis C Virus NS3 Protein. *J Virol*  
543 93.
- 544 25. Otto GA, Puglisi JD (2004) The pathway of HCV IRES-mediated translation initiation. *Cell*  
545 119: 369-380.
- 546 26. Zona L, Lupberger J, Sidahmed-Adrar N, Thumann C, Harris HJ, et al. (2013) HRas signal  
547 transduction promotes hepatitis C virus cell entry by triggering assembly of the host  
548 tetraspanin receptor complex. *Cell Host Microbe* 13: 302-313.
- 549 27. Salloum S, Wang H, Ferguson C, Parton RG, Tai AW (2013) Rab18 binds to hepatitis C virus  
550 NS5A and promotes interaction between sites of viral replication and lipid droplets.  
551 *PLoS Pathog* 9: e1003513.
- 552 28. Cifuentes Kottkamp A, De Jesus E, Grande R, Brown JA, Jacobs AR, et al. (2019) Atovaquone  
553 Inhibits Arbovirus Replication through the Depletion of Intracellular Nucleotides. *J Virol*  
554 93.
- 555 29. Ando T, Imamura H, Suzuki R, Aizaki H, Watanabe T, et al. (2012) Visualization and  
556 measurement of ATP levels in living cells replicating hepatitis C virus genome RNA.  
557 *PLoS Pathog* 8: e1002561.
- 558 30. Mankouri J, Tedbury PR, Gretton S, Hughes ME, Griffin SD, et al. (2010) Enhanced hepatitis  
559 C virus genome replication and lipid accumulation mediated by inhibition of AMP-  
560 activated protein kinase. *Proc Natl Acad Sci U S A* 107: 11549-11554.
- 561 31. Ross FA, Jensen TE, Hardie DG (2016) Differential regulation by AMP and ADP of AMPK  
562 complexes containing different gamma subunit isoforms. *Biochem J* 473: 189-199.
- 563 32. Xiao B, Sanders MJ, Underwood E, Heath R, Mayer FV, et al. (2011) Structure of  
564 mammalian AMPK and its regulation by ADP. *Nature* 472: 230-233.
- 565 33. Rena G, Hardie DG, Pearson ER (2017) The mechanisms of action of metformin.  
566 *Diabetologia* 60: 1577-1585.
- 567 34. Huang H, Kang R, Wang J, Luo G, Yang W, et al. (2013) Hepatitis C virus inhibits AKT-  
568 tuberous sclerosis complex (TSC), the mechanistic target of rapamycin (mTOR)  
569 pathway, through endoplasmic reticulum stress to induce autophagy. *Autophagy* 9:  
570 175-195.
- 571 35. Vignuzzi M, Lopez CB (2019) Defective viral genomes are key drivers of the virus-host  
572 interaction. *Nat Microbiol* 4: 1075-1087.
- 573 36. Sabo DL, Domingo E, Bandle EF, Flavell RA, Weissmann C (1977) A guanosine to adenosine  
574 transition in the 3' terminal extracistronic region of bacteriophage Q beta RNA leading  
575 to loss of infectivity. *J Mol Biol* 112: 235-252.
- 576 37. Davis AR, Hiti AL, Nayak DP (1980) Influenza defective interfering viral RNA is formed by  
577 internal deletion of genomic RNA. *Proc Natl Acad Sci U S A* 77: 215-219.
- 578 38. Nomoto A, Jacobson A, Lee YF, Dunn J, Wimmer E (1979) Defective interfering particles of  
579 poliovirus: mapping of the deletion and evidence that the deletions in the genomes of  
580 DI(1), (2) and (3) are located in the same region. *J Mol Biol* 128: 179-196.



- 581 39. O'Hara PJ, Nichol ST, Horodyski FM, Holland JJ (1984) Vesicular stomatitis virus defective  
582 interfering particles can contain extensive genomic sequence rearrangements and  
583 base substitutions. *Cell* 36: 915-924.
- 584 40. Holland JJ, Villarreal LP (1974) Persistent noncytotoxic vesicular stomatitis virus infections  
585 mediated by defective T particles that suppress virion transcriptase. *Proc Natl Acad Sci*  
586 *U S A* 71: 2956-2960.
- 587 41. Kirkegaard K, Baltimore D (1986) The mechanism of RNA recombination in poliovirus. *Cell*  
588 47: 433-443.
- 589 42. Arnold JJ, Cameron CE (1999) Poliovirus RNA-dependent RNA polymerase (3Dpol) is  
590 sufficient for template switching in vitro. *J Biol Chem* 274: 2706-2716.
- 591 43. Roux L, Simon AE, Holland JJ (1991) Effects of defective interfering viruses on virus  
592 replication and pathogenesis in vitro and in vivo. *Adv Virus Res* 40: 181-211.
- 593 44. Grande-Perez A, Lazaro E, Lowenstein P, Domingo E, Manrubia SC (2005) Suppression of  
594 viral infectivity through lethal defection. *Proc Natl Acad Sci U S A* 102: 4448-4452.
- 595 45. Martin V, Abia D, Domingo E, Grande-Perez A (2010) An interfering activity against  
596 lymphocytic choriomeningitis virus replication associated with enhanced mutagenesis.  
597 *J Gen Virol* 91: 990-1003.
- 598 46. Mims CA (1956) Rift Valley Fever virus in mice. IV. Incomplete virus; its production and  
599 properties. *Br J Exp Pathol* 37: 129-143.
- 600 47. Cave DR, Hendrickson FM, Huang AS (1985) Defective interfering virus particles modulate  
601 virulence. *J Virol* 55: 366-373.
- 602 48. Santak M, Markusic M, Balija ML, Kopac SK, Jug R, et al. (2015) Accumulation of defective  
603 interfering viral particles in only a few passages in Vero cells attenuates mumps virus  
604 neurovirulence. *Microbes Infect* 17: 228-236.
- 605 49. Bernardin F, Stramer SL, Rehmann B, Page-Shafer K, Cooper S, et al. (2007) High levels of  
606 subgenomic HCV plasma RNA in immunosilent infections. *Virology* 365: 446-456.
- 607 50. Cheroni C, Donnici L, Aghemo A, Balistreri F, Bianco A, et al. (2015) Hepatitis C Virus  
608 Deletion Mutants Are Found in Individuals Chronically Infected with Genotype 1  
609 Hepatitis C Virus in Association with Age, High Viral Load and Liver Inflammatory  
610 Activity. *PLoS One* 10: e0138546.
- 611 51. Karamichali E, Chihab H, Kakkanas A, Marchio A, Karamitros T, et al. (2018) HCV Defective  
612 Genomes Promote Persistent Infection by Modulating the Viral Life Cycle. *Front*  
613 *Microbiol* 9: 2942.
- 614 52. Noppornpanth S, Smits SL, Lien TX, Poovorawan Y, Osterhaus AD, et al. (2007)  
615 Characterization of hepatitis C virus deletion mutants circulating in chronically infected  
616 patients. *J Virol* 81: 12496-12503.
- 617 53. Pacini L, Graziani R, Bartholomew L, De Francesco R, Paonessa G (2009) Naturally occurring  
618 hepatitis C virus subgenomic deletion mutants replicate efficiently in Huh-7 cells and  
619 are trans-packaged in vitro to generate infectious defective particles. *J Virol* 83: 9079-  
620 9093.
- 621 54. Lopez-Jimenez AJ, Clemente-Casares P, Sabariego R, Llanos-Valero M, Bellon-Echeverria I,  
622 et al. (2014) Hepatitis C virus polymerase-polymerase contact interface: significance  
623 for virus replication and antiviral design. *Antiviral Res* 108: 14-24.
- 624 55. Marukian S, Jones CT, Andrus L, Evans MJ, Ritola KD, et al. (2008) Cell culture-produced  
625 hepatitis C virus does not infect peripheral blood mononuclear cells. *Hepatology* 48:  
626 1843-1850.
- 627 56. Agudo R, Ferrer-Orta C, Arias A, de la Higuera I, Perales C, et al. (2010) A multi-step process  
628 of viral adaptation to a mutagenic nucleoside analogue by modulation of transition  
629 types leads to extinction-escape. *PLoS Pathog* 6: e1001072.
- 630 57. Sanchez G, Bosch A, Gomez-Mariano G, Domingo E, Pinto RM (2003) Evidence for  
631 quasispecies distributions in the human hepatitis A virus genome. *Virology* 315: 34-42.

- 632 58. Clemente-Casares P, Lopez-Jimenez AJ, Bellon-Echeverria I, Encinar JA, Martinez-Alfaro E,  
633 et al. (2011) De novo polymerase activity and oligomerization of hepatitis C virus RNA-  
634 dependent RNA-polymerases from genotypes 1 to 5. PLoS One 6: e18515.
- 635 59. Vo NV, Tuler JR, Lai MM (2004) Enzymatic characterization of the full-length and C-  
636 terminally truncated hepatitis C virus RNA polymerases: function of the last 21 amino  
637 acids of the C terminus in template binding and RNA synthesis. Biochemistry 43:  
638 10579-10591.
- 639 60. Doskey CM, van 't Erve TJ, Wagner BA, Buettner GR (2015) Moles of a Substance per Cell Is  
640 a Highly Informative Dosing Metric in Cell Culture. PLoS One 10: e0132572.

641

642

643 **Table 1.** Effects of nucleosides on cell viability and HCV replication.  $CC_{50}$ ,  $IC_{50}$ , and  
644 therapeutic index (TI,  $CC_{50}/IC_{50}$ ) values are shown for Adenosine (Ade), Cytosine (Cyt),  
645 Guanosine (Gua), and Uridine (Uri) in Huh-7.5 reporter cells.

|     | $CC_{50}$ ( $\mu$ M) | $IC_{50}$ ( $\mu$ M) | TI         |
|-----|----------------------|----------------------|------------|
| Ade | 641 $\pm$ 40         | 108 $\pm$ 7          | 5.9        |
| Cit | > 800                | > 800                | n.d.       |
| Gua | > 800                | 164 $\pm$ 2.4        | $\geq$ 4.9 |
| Uri | > 800                | > 800                | n.d.       |

646

647

648 **Table 2.** Effects of nucleosides on BHK-21 cells viability and VSV, FMDV, and LCMV  
649 replication.  $CC_{50}$ ,  $IC_{50}$ , and therapeutic index (TI,  $CC_{50}/IC_{50}$ ) values are shown for Adenosine  
650 (Ade), Cytosine (Cit), Guanosine (Gua), and Uridine (Uri) in BHK-21 cells.

|     | $CC_{50}$ ( $\mu$ M) | $IC_{50}$ ( $\mu$ M) (TI)     |              |                                  |
|-----|----------------------|-------------------------------|--------------|----------------------------------|
|     |                      | VSV                           | FMDV         | LCMV                             |
| Ade | $391 \pm 68$         | $650 \pm 105.4$ (0.6)         | > 800 (n.d.) | $213 \pm 56.2$ (1.8)             |
| Cit | > 800                | > 800 (n.d.)                  | > 800 (n.d.) | $566.4 \pm 216.7$ ( $\geq 1.4$ ) |
| Gua | > 800                | $734 \pm 59.4$ ( $\leq 1.1$ ) | > 800 (n.d.) | $348 \pm 36$ ( $\geq 2.3$ )      |
| Uri | > 800                | > 800 (n.d.)                  | > 800 (n.d.) | $157.8 \pm 7.6$ ( $\geq 5.1$ )   |

651 n.d. Not Determined.

652

653 **Table 3.** Mutant spectrum analysis of the hepatitis C virus populations passaged in the absence and presence of guanosine (Gua)

654

| 655 | HCV population <sup>a</sup> | N. of nucleotides analyzed<br>(clones/haplotypes) <sup>b</sup> | N. of different<br>(total) mutations <sup>c</sup> | Mutation frequency       |                          |
|-----|-----------------------------|----------------------------------------------------------------|---------------------------------------------------|--------------------------|--------------------------|
|     |                             |                                                                |                                                   | 656 Minimum <sup>d</sup> | 657 Maximum <sup>e</sup> |
| 658 | HCV p0, [no drug] p3        | 28,208 (53/21)                                                 | 23 (25)                                           | 8.2 x 10 <sup>-4</sup>   | 8.9 x 10 <sup>-4</sup>   |
|     | HCV p0, [Gua 500 μM] p3     | 33,339 (64/34)                                                 | 45 (79)                                           | 1.4 x 10 <sup>-3</sup>   | 2.4 x 10 <sup>-3</sup>   |
|     | HCV p0, [Gua 800 μM] p3     | 35,606 (68/30)                                                 | 32 (59)                                           | 9.0 x 10 <sup>-4</sup>   | 1.7 x 10 <sup>-3</sup>   |

661 <sup>a</sup>The

662 populations analyzed are those schematically represented in Fig 1, and their origin is detailed in Materials and Methods; [no drug] means  
663 passages in absence of drug; [Gua 500 μM] means passages in the presence of 500 μM guanosine; [Gua 800 μM] means passages in the presence  
664 of 800 μM guanosine; p indicates passage number.

665 <sup>b</sup>The genomic region analyzed by molecular cloning-Sanger sequencing spans residues 6220 to 6758 of the NS4B- and NS5A-coding region; the  
666 residue numbering corresponds to the JFH-1 genome (GenBank accession number #AB047639). The values in parenthesis indicate the number  
667 of clones analyzed followed by the number of haplotypes (number of different RNA sequences) found in the mutant spectrum.

668 <sup>c</sup>Number of different and total mutations identified by comparing the sequence of each individual clone with the consensus sequence of the  
669 corresponding population.

670 <sup>d</sup>Data represent the average number of different mutations (counted relative to the consensus sequence of the corresponding population) per  
671 nucleotide in the components of the mutant spectrum. The statistical significance of the differences between two populations ( $\chi^2$  test) is the  
672 following: HCV p0, [no drug] p3 versus HCV p0, [Gua 500 μM] p3: p = 0.0622; HCV p0, [no drug] p3 versus HCV p0, [Gua 800 μM] p3: p =  
673 0.8257; HCV p0, [Gua 500 μM] p3 versus HCV p0, [Gua 800 μM] p3: p = 0.0977.

674 °Data represent the average number of total mutations (counted relative to the consensus sequence of the corresponding population) per  
675 nucleotide in the components of the mutant spectrum relative to the consensus sequence of the corresponding population. The statistical  
676 significance of the differences between two populations (proportion test) is the following: HCV p0, [no drug] p3 versus HCV p0, [Gua 500 µM]  
677 p3:  $p < 0.0001$ ; HCV p0, [no drug] p3 versus HCV p0, [Gua 800 µM] p3:  $p = 0.0107$ ; HCV p0, [Gua 500 µM] p3 versus HCV p0, [Gua 800 µM]  
678 p3:  $p = 0.0452$

679

680 **Table 4.** Indels found in the mutant spectra of HCV p0 after 3 passages in the absence  
 681 and presence of Gua 500  $\mu$ M and 800  $\mu$ M.

682

| HCV population <sup>a</sup>        | Indel                         | Position <sup>c</sup> | Number of deleted or inserted nucleotides | Region | Premature STOP position | # of clones |
|------------------------------------|-------------------------------|-----------------------|-------------------------------------------|--------|-------------------------|-------------|
| HCV p0,<br>no Gua                  | -                             | 0                     | -                                         | -      | -                       |             |
| HCV p0,<br>[Gua 500 $\mu$ M]<br>p3 | <b>Deletion 1</b>             | 6220                  | 1                                         | NS4B   | 6243                    | 2           |
|                                    | <b>Deletion 2<sup>b</sup></b> | 6278-6287             | 10                                        | NS5A   | 6315                    | 4           |
|                                    | <b>Deletion 3<sup>b</sup></b> | 6289-6292             | 4                                         | NS5A   | 6315                    | 4           |
|                                    | <b>Deletion 4<sup>b</sup></b> | 6294-6296             | 3                                         | NS5A   | 6315                    | 4           |
|                                    | <b>Deletion 5<sup>b</sup></b> | 6298-6300             | 3                                         | NS5A   | 6315                    | 4           |
|                                    | <b>Deletion 6</b>             | 6659-6704             | 46                                        | NS5A   | 6864                    | 1           |
|                                    | <b>Deletion 7</b>             | 6744                  | 1                                         | NS5A   | 6864                    | 1           |
|                                    | <b>Deletion 8</b>             | 6751                  | 1                                         | NS5A   | 6864                    | 1           |
|                                    | <b>Deletion 9</b>             | 6753-6756             | 4                                         | NS5A   | 6864                    | 1           |
|                                    | <b>Deletion 10</b>            | 6757                  | 1                                         | NS5A   | 6864                    | 1           |
| HCV p0,<br>[Gua 800 $\mu$ M]<br>p3 | <b>Insertion 1</b>            | 6225                  | 1                                         | NS4B   | 6246                    | 1           |
|                                    | <b>Insertion 2</b>            | 6301                  | 1                                         | NS5A   | 6298                    | 1           |
|                                    | <b>Deletion 1</b>             | 6220                  | 1                                         | NS4B   | 6243                    | 13          |
|                                    | <b>Deletion 2</b>             | 6231                  | 1                                         | NS4B   | 6243                    | 1           |
|                                    | <b>Deletion 3</b>             | 6748                  | 1                                         | NS5A   | 6864                    | 3           |
| HCV p0,<br>[Gua 800 $\mu$ M]<br>p3 | <b>Deletion 4</b>             | 6749                  | 1                                         | NS5A   | 6864                    | 1           |
|                                    | <b>Deletion 5</b>             | 6757                  | 1                                         | NS5A   | 6864                    | 2           |

683 <sup>a</sup>The populations analyzed are those schematically represented in Fig 1, and their origin  
 684 is detailed in Materials and Methods; [Gua 500  $\mu$ M] means passages in the presence of  
 685 500  $\mu$ M guanosine; [Gua 800  $\mu$ M] means passages in the presence of 800  $\mu$ M  
 686 guanosine; p indicates passage number.

687 <sup>b</sup>Deletions 2, 3, 4 and 5 were found always together

688 <sup>c</sup>The genomic region analyzed by molecular cloning-Sanger sequencing spans residues  
689 6220 to 6758 of the NS4B- and NS5A-coding region; the residue numbering  
690 corresponds to the JFH-1 genome (GenBank accession number #AB047639).

691



692 **FIGURE LEGENDS.**

693 **Figure 1. Effect of ribonucleosides on HCV replication.** (A) and (B) Effect of guanosine  
694 (Gua) on HCV p0 replication. Infectious progeny obtained in the presence of Gua 500  $\mu$ M (A)  
695 and Gua 800  $\mu$ M (B); four replicas for each condition are shown (red squares). HCV p0 titer in  
696 the absence of treatment (black circles) and values for a HCV lethal mutant GNN (black  
697 crosses) are also shown (see Methods). (C) and (D) Effect of adenosine (Ade, blue squares),  
698 cytosine (Cyt, green squares), and uridine (Uri, orange squares) on HCV p0 replication.  
699 Infectious progeny obtained in the presence of the corresponding nucleoside at 500  $\mu$ M (C) and  
700 at 800  $\mu$ M (D). HCV p0 viral titer in the absence of treatment (black circles) and values for a  
701 HCV lethal mutant GNN (black crosses) are also shown. (E) HCV p100 viral titer in the  
702 absence (black circles) or presence of Gua 500  $\mu$ M (yellow symbols), and Gua 800  $\mu$ M (red  
703 symbols). Two replicates are shown for each condition in presence of nucleosides. The  
704 discontinuous horizontal line marks the limit of detection of virus infectivity. Procedures for  
705 serial infections and titration of infectivity are detailed in Materials and Methods.

706 **Figure 2. Treatment with Gua causes a reduction in the efficiency of early aspects of the**  
707 **infection.** (A) Impact of nucleoside treatment on single cycle trans-complemented HCV  
708 particles (HCVtcp) infection efficiency. Huh-7 cells were pre-treated with the indicated doses of  
709 nucleoside for 20 hours before inoculation with HCVtcp in the presence or absence of the  
710 nucleosides. As a positive inhibition control, target cells were treated with the entry inhibitor  
711 hydroxyzine (HDH) at the time of infection (5 $\mu$ M). Single cycle infection efficiency was  
712 determined by measuring luciferase activity in total cell extracts 48 hours post-inoculation. (B)  
713 Huh-7 cells were pre-treated with the indicated doses of nucleoside for 20 hours before  
714 transfection with in vitro-transcribed subgenomic viral RNA-containing liposomes in the  
715 presence or absence of the nucleosides. As a positive inhibition control, target cells were treated  
716 with the replication inhibitor 2'-c-methyladenosine (2mAde) (10  $\mu$ M). Primary translation (5  
717 hours) and RNA replication efficiency (24 and 48 hours) was determined by measuring  
718 luciferase activity in total cell extracts at different times post-transfection. Data are shown as

719 average and standard deviation of two experiments performed in triplicate (N=6). Significance  
720 (Student's T-test): \*\*\* $p < 0.0005$ ; \* $p < 0.05$ .

721 **Figure 3. Effect of nucleosides on FMDV, LCMV and VSV replication.** Effect of adenosine  
722 (Ade), cytidine (Cyt), uridine (Uri), and guanosine (Gua) on the production of infectious  
723 progeny of FMDV (A), LCMV (B) and VSV (C) in BHK-21 cells at an initial m.o.i. of 0.05  
724 TCID<sub>50</sub> per cell, in the absence (C-) or presence of 800  $\mu$ M of the indicated nucleoside.  
725 Infectivity was determined at passage 3 in the cell culture supernatant as described in Materials  
726 and Methods. (D) Comparative inhibition of VSV and HCV p0 progeny production in Huh-7.5  
727 reporter cells in the presence of 800  $\mu$ M Gua. The titer shown for HCV is the average (four  
728 replicas) of titers determined at passage 3 in the supernatants of the serial infections  
729 (corresponding to Fig 1). Procedures for serial infections and titration of infectivity are detailed  
730 in Materials and Methods. Significance (Student's T-test): \*\*  $p < 0.005$ .

731

732 **Figure 4. Effect of Gua on NS5B $\Delta$ 21 RNA polymerase activity.** (A) Recombinant HCV  
733 NS5B $\Delta$ 21 polymerase was added to a reaction containing a 540-nt RNA template [18], the four  
734 nucleoside-triphosphates (ATP, CTP, GTP, and UTP) and the indicated concentrations of Gua.  
735 Product quantification from three replicates (average  $\pm$  SEM) and a representative experiment  
736 (below) are shown. Polymerase activity is normalized with respect to its maximum activity. The  
737 band indicates a new synthesis RNA product of 540 nt length. (B) A representative experiment  
738 as in A, but using the 19-nt LE19 RNA as a template. DN, PE, and TS indicate reaction  
739 products of *de novo* synthesis, primer extension, and template switching, respectively [54].  
740 Procedures are detailed in Materials and Methods. Significance (Student's T-test): \*\*  $p < 0.005$ .

741

742 **Figure 5. Effect of Gua on intracellular nucleotides.** Effect of treatment of Huh-7.5 cells with  
743 Gua on the level of intracellular nucleoside-triphosphates (A) and intracellular nucleoside-  
744 diphosphates (B). Data are represented as a box and whisker chart showing distribution of data  
745 into quartiles, highlighting the mean and outliers. Error lines indicate variability outside the

746 upper and lower quartiles. Data points (red circles) are grouped in black (no treatment), orange  
747 (500  $\mu$ M Gua) and blue (800  $\mu$ M Gua) boxes. Significance (Student's T-test): \*  $p < 0.05$ ; \*\*  $p <$   
748  $0.005$ ; \*\*\*  $p < 0.0005$ . The table shows the p-value and the fold of difference between treatment  
749 conditions for each nucleoside di- and triphosphate.

750

751 **Figure 6. Effect of nucleoside-triphosphate concentration on NS5B $\Delta$ 21 RNA polymerase**  
752 **activity. (A)** Polyacrylamide gel showing the products for de novo (DN), primer extension (PE)  
753 and template switching (TS) obtained with HCV NS5B $\Delta$ 21 at increasing concentrations (100,  
754 500, 800, and 1000  $\mu$ M) of UTP in the presence of radiolabeled  $\alpha^{32}$ P-CTP. ATP and GTP  
755 concentrations were maintained at 100  $\mu$ M and 500  $\mu$ M, respectively (left panel). Graphic  
756 representation of densitometric values obtained from the electropherogram shown in A (red  
757 diamonds, yellow triangles, and black squares correspond to *de novo* (DN), primer extension  
758 (PE), and template switching (TS) activities, respectively) (right panel). **(B)** Corresponds to  
759 experiments as in A but for increasing concentrations of ATP, with UTP and GTP maintained at  
760 100  $\mu$ M and 500  $\mu$ M, respectively. **(C)** Corresponds to experiments as in A but for increasing  
761 concentrations of GTP, with ATP and UTP both maintained at 100  $\mu$ M. Activities were  
762 normalized to their maximum values. Densitometric data represent the mean of at least three  
763 independent experiments. Error bars correspond to standard error of the mean. Horizontal lines  
764 indicate statistically significant differences (Student's T-test) between the activity values that  
765 link, using the same color code as the activity type. Details of the activity measurements are  
766 given in Materials and Methods. Significance (Student's T-test): \*\*\*  $p < 0.0005$ , \*\*  $p < 0.005$ , \*  
767  $p < 0.05$ .

768

769 **Figure 7. Effect of NDPs on NS5B $\Delta$ 21 RNA polymerase activity. (A)** Polyacrylamide gel  
770 showing the products for *de novo* (DN), primer extension (PE) and template switching (TS)  
771 obtained with HCV NS5B $\Delta$ 21 at increasing concentrations (0, 166, 333, 500, 800, and 1000  
772  $\mu$ M) of UDP in the presence of ATP and UTP at a final concentration of 100  $\mu$ M, GTP at 500

773  $\mu\text{M}$ , and radiolabeled  $\alpha^{32}\text{P}$ -CTP (left panel). Graphic representation of densitometric values  
774 obtained from the electropherogram shown in A (red diamonds, yellow triangles, and black  
775 squares correspond to *de novo* (DN), primer extension (PE), and template switching (TS)  
776 activities, respectively) (right panel). **(B)** Corresponds to experiments as in A but for increasing  
777 concentrations of ADP. **(C)** corresponds to experiments as in A but for increasing  
778 concentrations of GDP. Activities were normalized to their maximum values. Densitometric  
779 data represent the mean of at least three independent experiments. Error bars correspond to  
780 standard error of the mean. Horizontal lines indicate statistically significant differences  
781 (Student's T-test) between activity values, using the same color code as the activity type.  
782 Details of the activity measurements are given in Materials and Methods. Significance  
783 (Student's T-test): \*\*  $p < 0.005$ , \*  $p < 0.05$ .

784

785 **Figure 8.** Effect of guanosine on HCV specific infectivity. Huh-7.5 reporter cells were infected  
786 with HCVp0 at an initial m.o.i. of 0.05 TCID<sub>50</sub>/cell, in the absence or presence of Gua at the  
787 indicated concentrations. HCV GNN infection was used as a negative control. **(A)** Extracellular  
788 viral RNA measured by quantitative RT-PCR in different passages. The populations correspond  
789 to those of the experiment described in Fig 1 and the values in each passage are the average of  
790 the three replicas; standard deviations are given. **(B)** Specific infectivities calculated from the  
791 infectivity values of the Fig. 1A and Fig. 1B and the extracellular RNA concentrations indicated  
792 in Fig 8A. The horizontal dashed line indicates the limit of detection of viral RNA and specific  
793 infectivity. Black, yellow, and red symbols correspond to no drug, Gua 500  $\mu\text{M}$ , and Gua 800  
794  $\mu\text{M}$ , respectively. Values for a HCV lethal mutant GNN (black crosses) are also shown. Details  
795 of the procedures are given in Materials and Methods. Significance (Student's T-test): \*\*  $p <$   
796 0.005, \*  $p < 0.05$ .

797

798 **Figure 9. Indels found in the mutant spectrum of HCV p0 passaged in the presence of**  
799 **Gua.** The nucleotide sequence of HCV genomic residues 6220 to 6758 was determined for 53

800 molecular clones derived from the population in absence of Gua, and 132 molecular clones from  
801 populations passaged in presence of Gua (data in Table 3). Deduced amino acids (single letter  
802 code) are given for residues located at the carboxy-terminal region of NS4B preceding NS5A  
803 amino acids. For clarity, only residues around insertions or deletions are shown; three squared  
804 points indicate missing amino acids (sequence is that of JFH-1; accession number AB047639).  
805 No indels were detected in the population passaged in absence of Gua. **(A)** Deletions in the  
806 population passaged in the presence of 500  $\mu$ M guanosine. Red boxes indicate nucleotides that  
807 were deleted in a component of the mutant spectrum, with the deletion size indicated in the  
808 filled boxes. **(B)** Insertions in the mutant spectrum of the population passaged in the presence of  
809 500  $\mu$ M Gua are marked with a blue triangle. **(C)** Deletions found in the HCV populations  
810 passaged in the presence of 800  $\mu$ M Gua. Procedures for HCV genome sequencing are  
811 described in Materials and Methods.

812

Figure 1

A

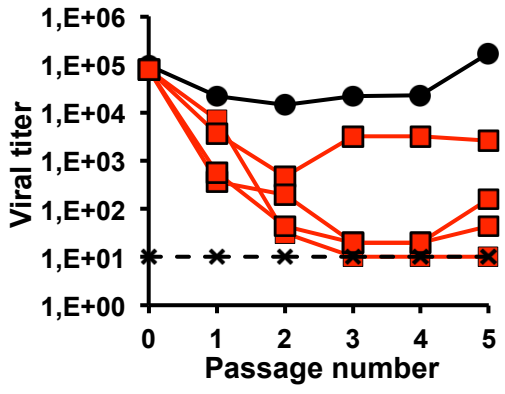

B

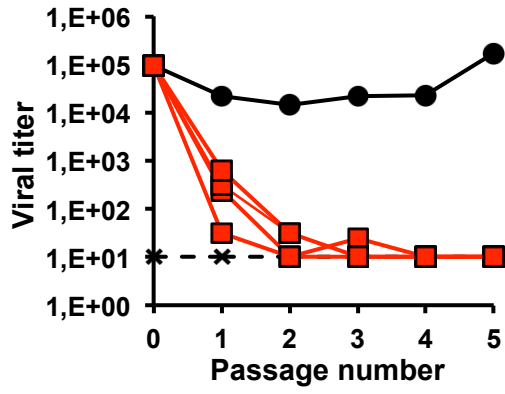

C

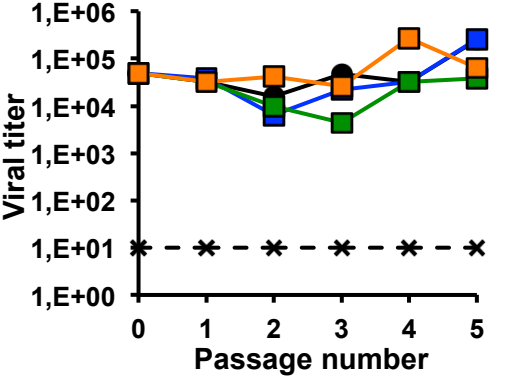

D

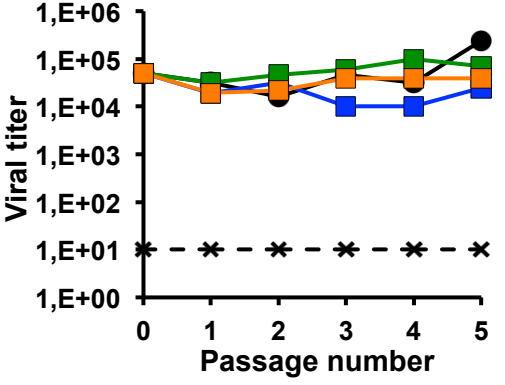

E

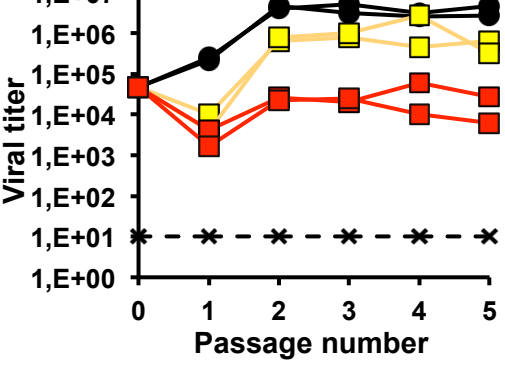

Figure 2

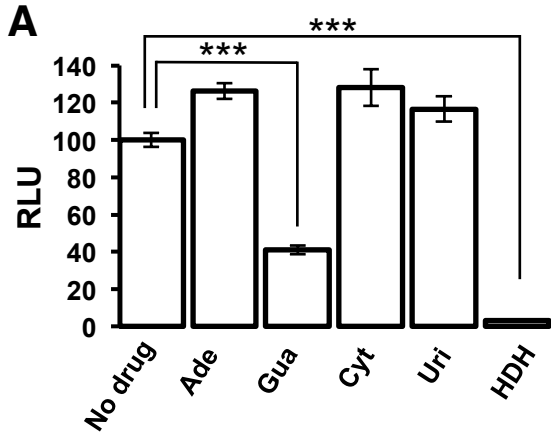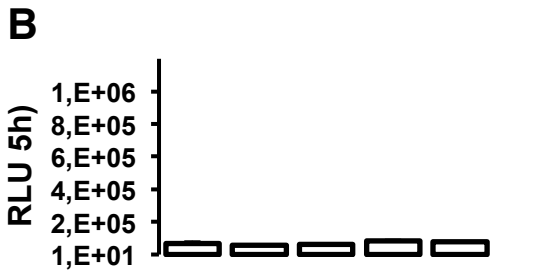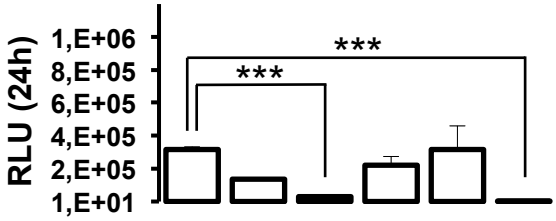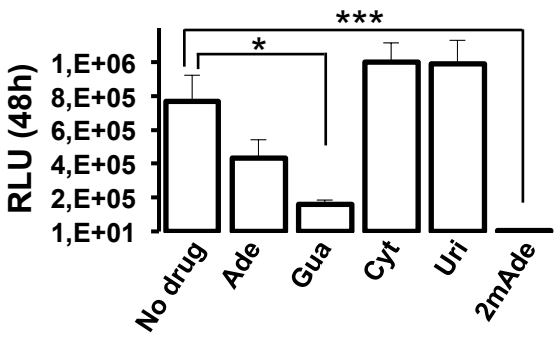

**Figure 3**

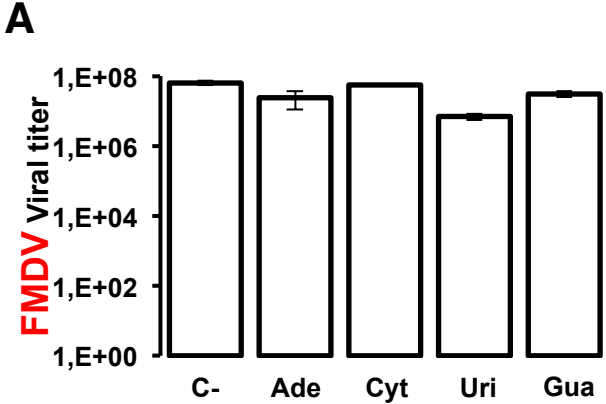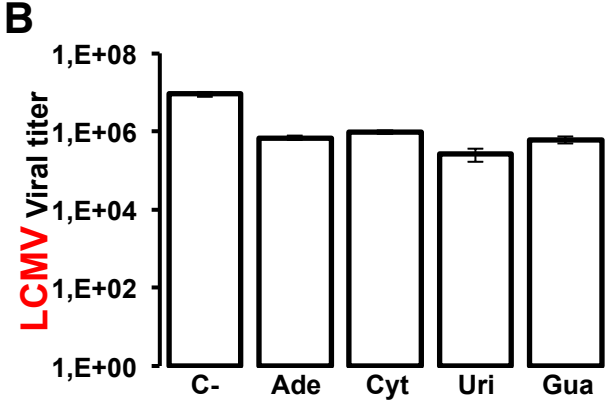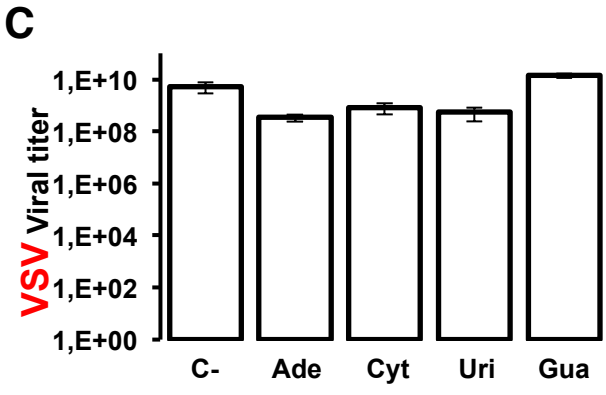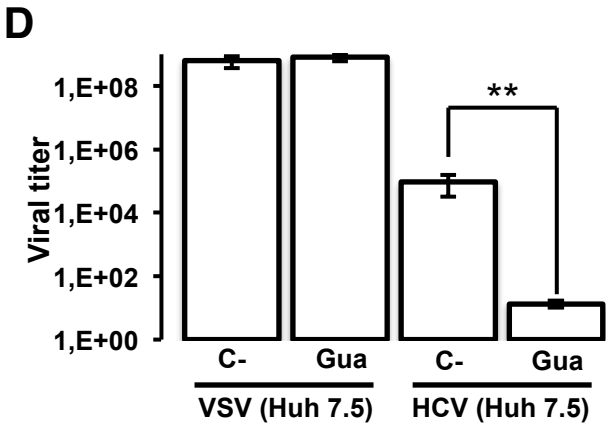



**Figure 4**

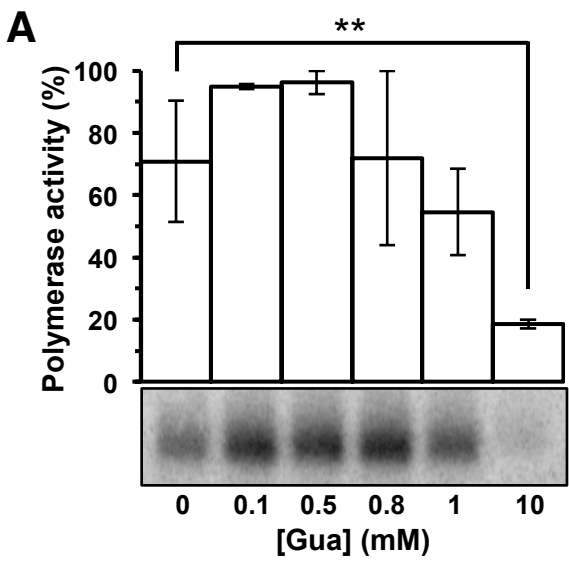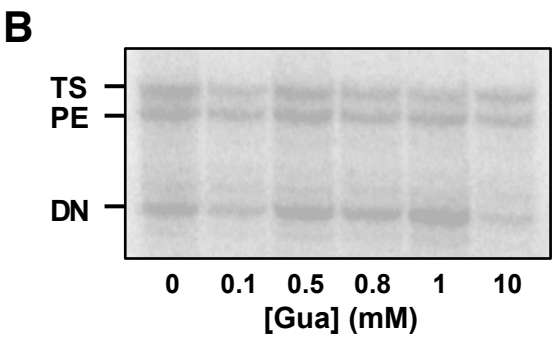

**Figure 5**

**A**

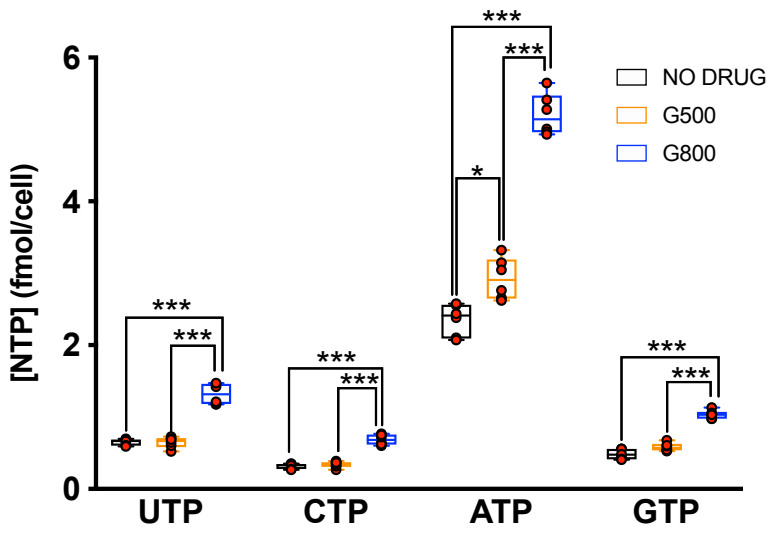

|     |         | Guanosine treatment |          |            |
|-----|---------|---------------------|----------|------------|
|     |         | 0 vs 500            | 0 vs 800 | 500 vs 800 |
| UTP | x-fold  | 0,9                 | 2        | 2          |
|     | p-value | 0,951               | 0,00026  | 7,50E-06   |
| CTP | x-fold  | 1                   | 2,1      | 2          |
|     | p-value | 0,484               | 0,00029  | 3,10E-06   |
| ATP | x-fold  | 1,2                 | 2,2      | 1,8        |
|     | p-value | 0,027               | 1,70E-05 | 2,50E-08   |
| GTP | x-fold  | 1,2                 | 2,1      | 1,8        |
|     | p-value | 0,059               | 3,70E-05 | 2,80E-08   |

**B**

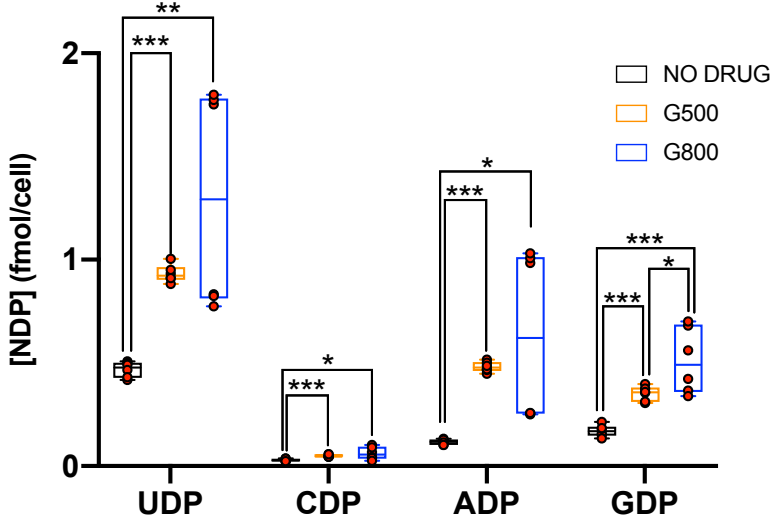

|     |         | Guanosine treatment |          |            |
|-----|---------|---------------------|----------|------------|
|     |         | 0 vs 500            | 0 vs 800 | 500 vs 800 |
| UDP | x-fold  | 2,0                 | 2,8      | 1,4        |
|     | p-value | 1,00E-06            | 0,0034   | 0,1        |
| CDP | x-fold  | 1,7                 | 2,1      | 1,3        |
|     | p-value | 3,16E-04            | 0,027    | 0,3        |
| ADP | x-fold  | 4,1                 | 5,4      | 1,3        |
|     | p-value | 1,00E-06            | 0,012    | 0,39       |
| GDP | x-fold  | 2,1                 | 3,0      | 1,5        |
|     | p-value | 2,00E-06            | 4,05E-04 | 0,034      |

Figure 6

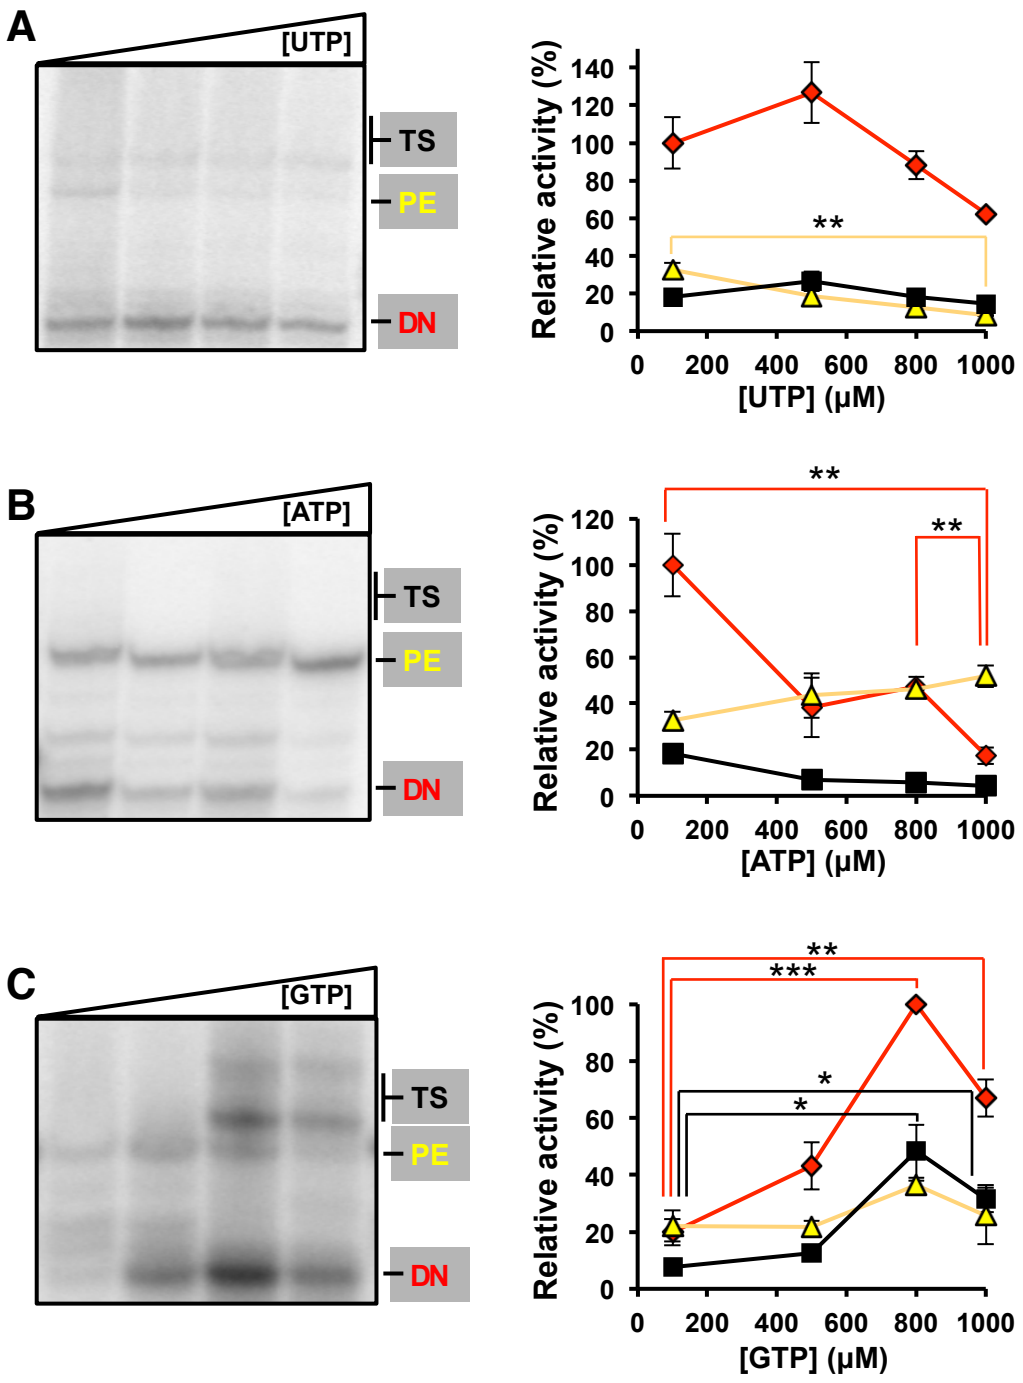

Figure 7

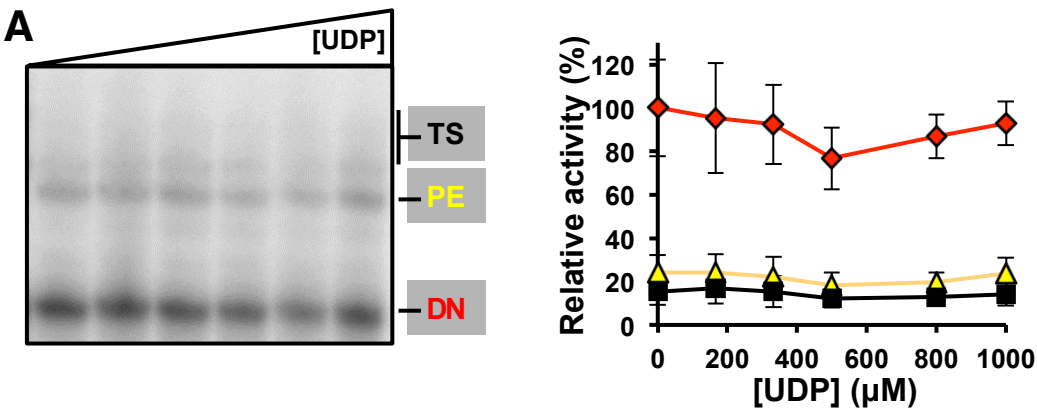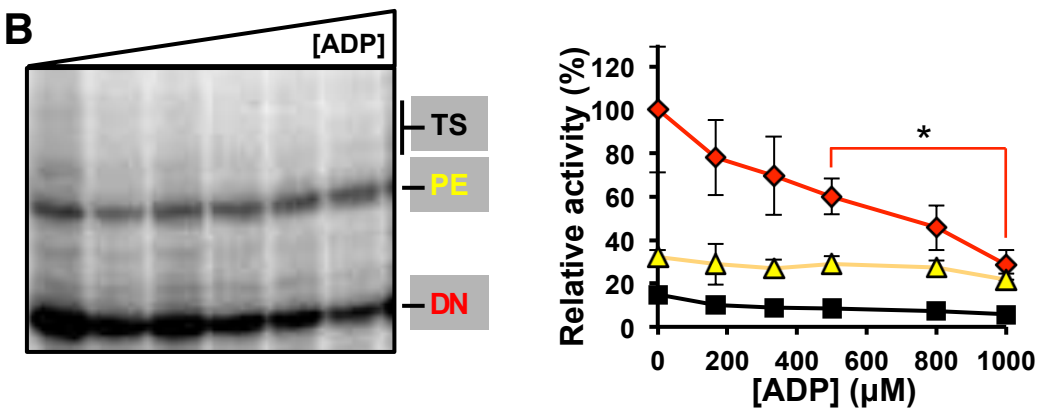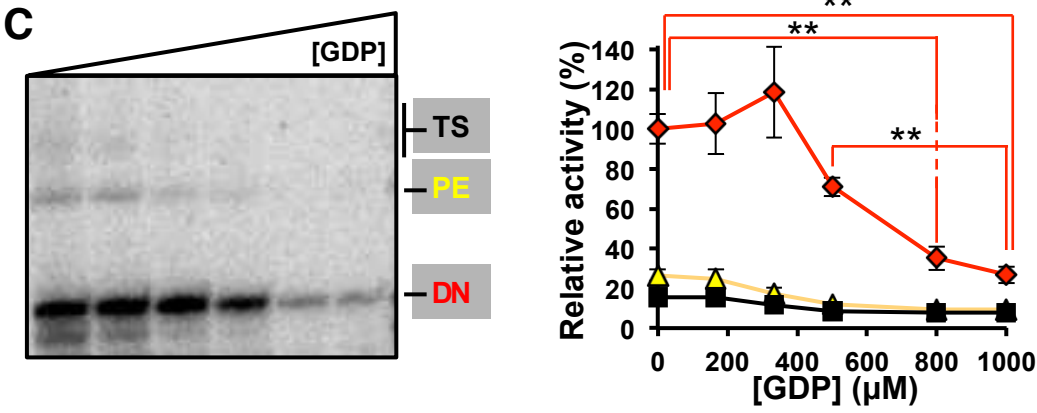

**Figure 8**

**A**

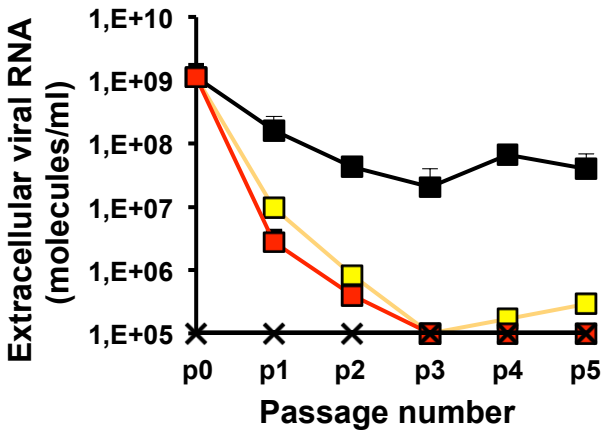

**B**

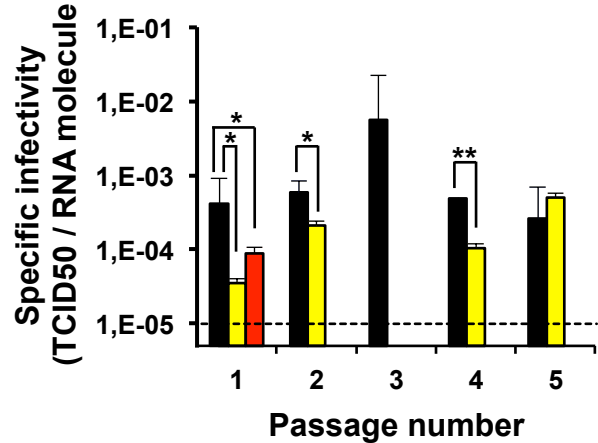

Figure 9

A

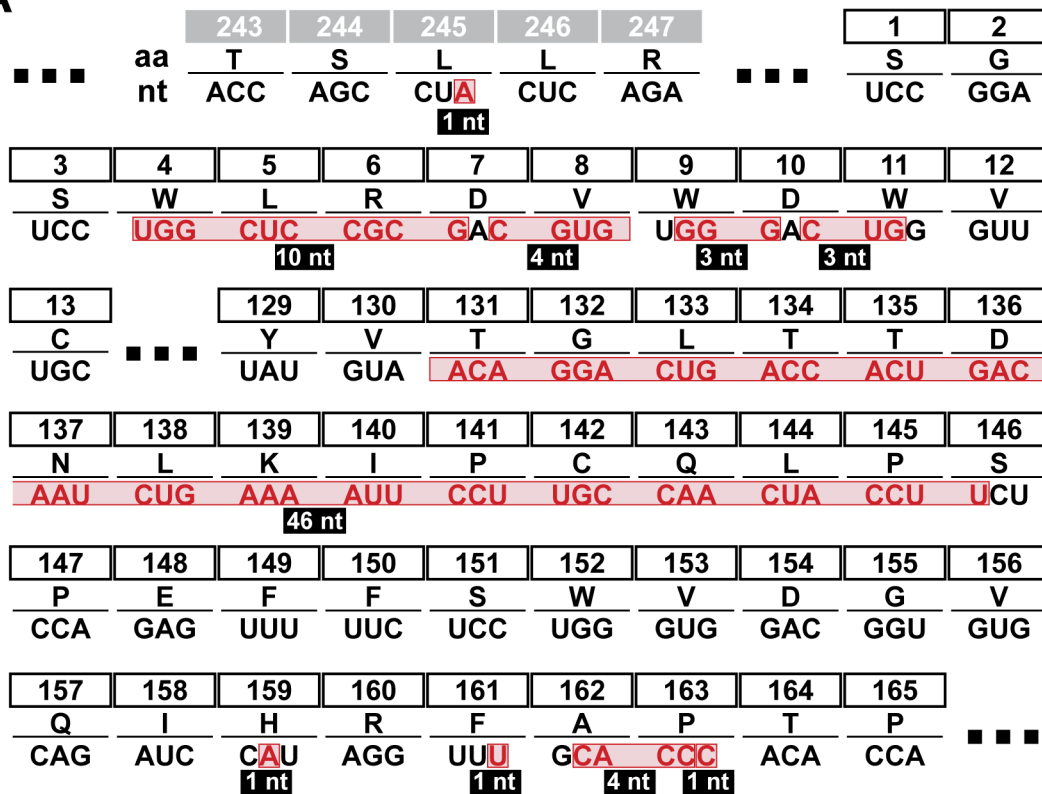

B

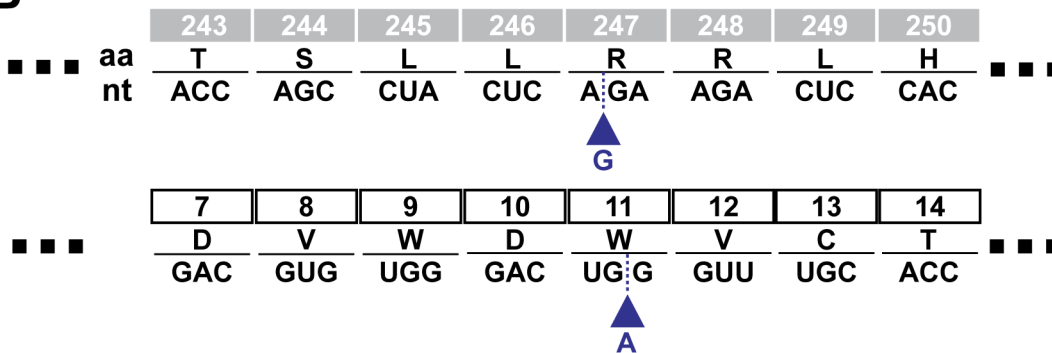

C

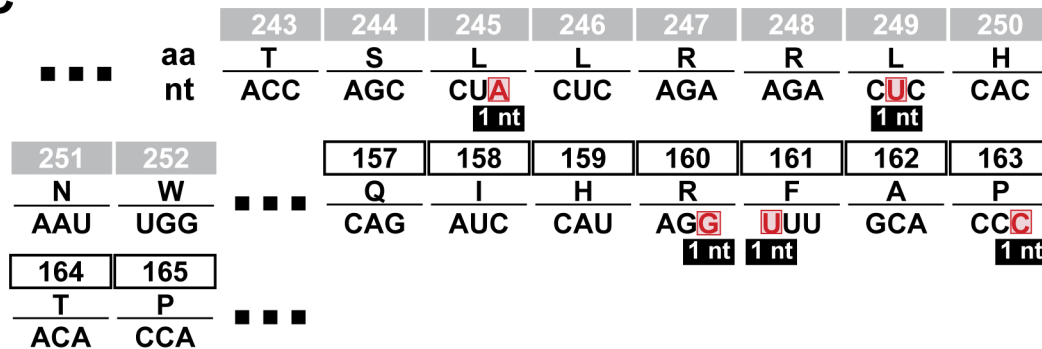

Source: https://www.biorxiv.org/content/biorxiv/early/2020/02/24/2020.02.21.959536.full.pdf
